# Supplementary material for: Probing local structure of glass with orientation-dependent luminescence
Source: Royal Society of Chemistry journal article supplement (doi:10.1039/d3cp03565d), 2023-01-01

## Supporting Information

### **Probing Local Structure of Glass with Orientation-Dependent Luminescence**

Yuichiro Tokoro<sup>1\*</sup>, Tetsuya Nakagawa<sup>2</sup>, Shin-ichi Yamamoto<sup>1</sup>, Toshio Koizumi<sup>1</sup> and Toshiyuki Oyama<sup>2\*</sup>

E-mail: tokoro@nda.ac.jp; oyama-toshiyuki-wz@ynu.ac.jp

## Table of Contents

|                                                     |     |
|-----------------------------------------------------|-----|
| 1. General Information.....                         | S1  |
| 2. Synthesis.....                                   | S1  |
| 3. NMR spectra.....                                 | S6  |
| 4. Crystallography.....                             | S20 |
| 5. Density functional theory (DFT) calculation..... | S26 |
| 6. Thermal analysis.....                            | S32 |
| 7. UV-vis absorption spectra.....                   | S33 |
| 8. Photoluminescence data.....                      | S34 |

## 1. General Information

Commercially available reagents and solvents were used as received, without further purification. Single crystals were grown by the slow diffusion of ethanol ((*S*)-**3a-E**) or hexane ((*S*)-**3a-H**, *rac*-**3a**, **3b**) into dichloromethane solutions. Crystalline powder samples for PXRD, photoluminescence spectroscopy, and thermal analysis were obtained by adding dichloromethane solution to ethanol, followed by filtration. Glass samples for the PXRD analysis were prepared by cooling the melt on glass plates or in vials with ice, followed by crushing. Film samples for photoluminescence spectra were prepared by addition of the macrocycles to 20 wt% toluene solution of ZEONEX 480 solution, followed by spin-coating onto glass plates. The  $^1\text{H}$  and  $^{13}\text{C}$  NMR spectra were recorded on a Bruker BioSpin DRX500 NMR or JEOL JNM-ECZ500R spectrometer. (500 MHz) spectrometer, with sample solutions prepared using  $\text{CD}_2\text{Cl}_2$ . Chemical shifts are reported in  $\delta$  units downfield of the internal reference ( $\text{Me}_4\text{Si}$ ). High-resolution mass spectra (HRMS) were recorded using a Bruker Compact (APCI) or a Hitachi High-Technologies Nano Frontier LD (ESI) spectrometer. The PXRD experiments were performed on a Bruker D8 ADVANCE diffractometer with  $\text{Cu K}\alpha$  ( $\lambda = 1.5406 \text{ \AA}$ ) at room temperature. Simulated PXRD patterns were obtained using Mercury 2020.

## 2. Synthesis

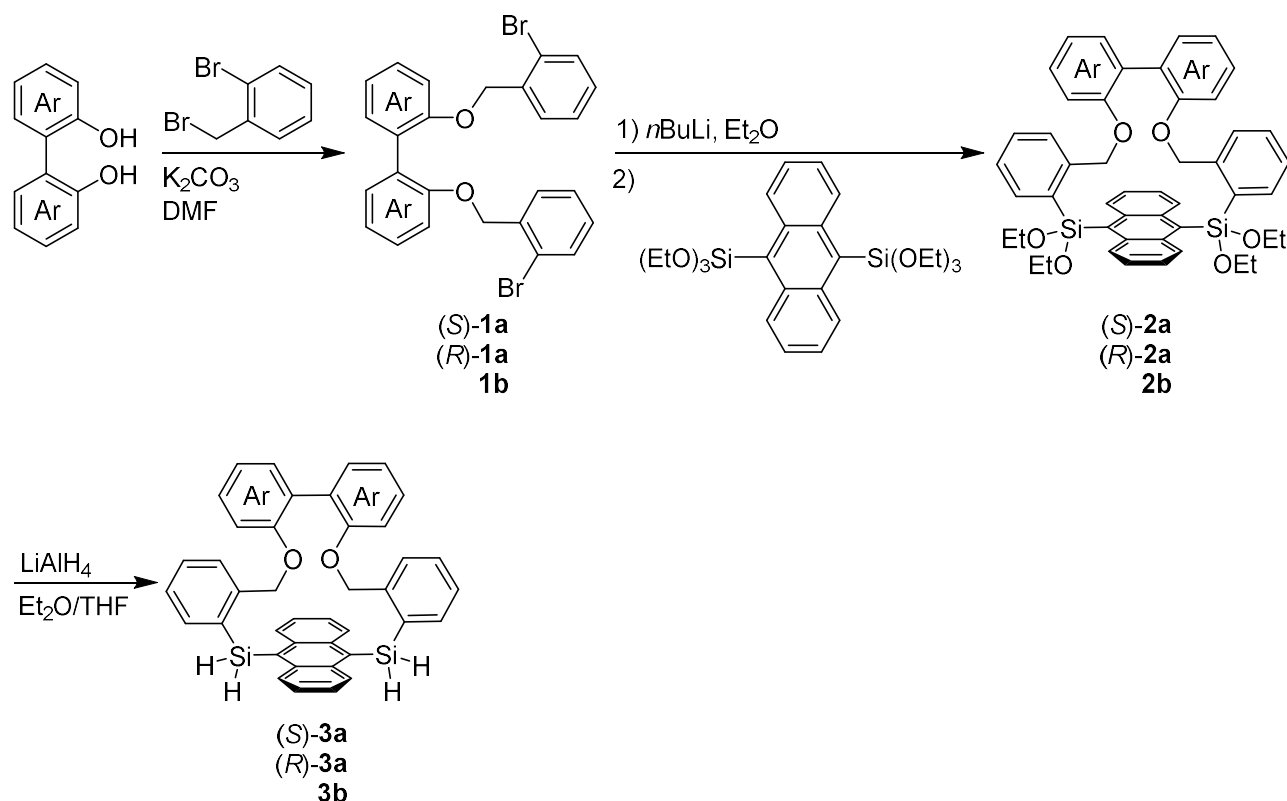

Fig. S1 Synthesis of macrocycles.

### (*S*)-2,2'-Bis(2-bromobenzoyloxy)-1,1'-binaphthyl ((*S*)-**1a**)

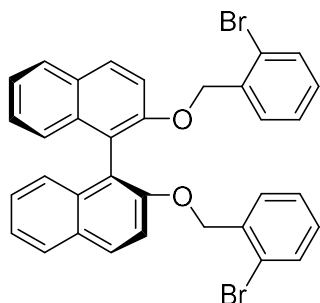

A solution of (*S*)-(-)-1,1'-bi-2-naphthol (4.58 g, 16.0 mmol), 2-bromobenzyl bromide (12.0 g, 48.0 mmol), potassium carbonate (8.85 g, 64.0 mmol) in *N,N*-dimethylformamide (48 mL) was stirred at 70 °C for 11 h, followed by addition of water (ca. 100 mL). The precipitate was collected by filtration and washed by water and methanol. The crude product was purified by recrystallization from dichloromethane/methanol to give a white solid (9.12 g, 14.6 mmol, 91% yield). Mp: 137-139 °C  $^1\text{H}$  NMR (500 MHz,  $\text{CD}_2\text{Cl}_2$ ):  $\delta = 8.01$  (d, 2H, Ar-*H*,  $J = 9.0$  Hz), 7.92 (d, 2H, Ar-*H*,  $J = 8.2$  Hz), 7.46 (m, 4H, Ar-*H*), 7.37 (ddd, 2H, Ar-*H*,  $J = 8.1, 6.7, 1.4$  Hz), 7.26 (ddd, 2H, Ar-*H*,  $J = 8.4, 6.8, 1.5$  Hz), 7.21 (d, 2H, Ar-*H*,  $J = 8.5$  Hz), 7.03 (ddd, 2H, Ar-*H*,  $J = 7.9, 7.4, 1.8$  Hz), 6.94 (td, 2H, Ar-*H*,  $J = 7.5, 1.2$  Hz), 6.87 (m, 2H, Ar-*H*), 5.13 (m, 4H,  $-\text{OCH}_2-$ ) ppm.  $^{13}\text{C}$  NMR (125 MHz,  $\text{CD}_2\text{Cl}_2$ ):  $\delta = 154.4, 137.2, 134.7, 132.7,$

130.15, 130.10, 129.3, 128.7, 128.6, 127.8, 127.1, 125.8, 124.5, 122.0, 120.8, 115.9, 71.0 ppm. HRMS (ESI-TOF) calcd for  $C_{34}H_{24}Br_2O_2$   $[M]^+$ : 622.0138; found: 622.0156.  $[\alpha]_D^{20} = -42$  ( $c = 1.00$ , THF).

### (R)-2,2'-Bis(2-bromobenzyloxy)-1,1'-binaphthyl ((R)-1a)

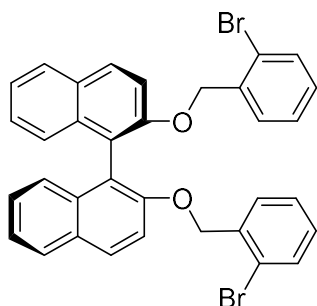

A solution of (R)-(-)-1,1'-bi-2-naphthol (2.86 g, 10.0 mmol), 2-bromobenzyl bromide (6.00 g, 24.0 mmol), potassium carbonate (4.15 g, 30.0 mmol) in *N,N*-dimethylformamide (30 mL) was stirred at 70 °C for 46 h, followed by addition of water (ca. 50 mL). The mixture was extracted with diethyl ether, washed with water and brine, dried over  $MgSO_4$ , and concentrated. The crude product was purified by recrystallization from dichloromethane/ethanol to give a white solid (4.49 g, 7.19 mmol, 72% yield). Mp: 137-139 °C  $^1H$  NMR (500 MHz,  $CD_2Cl_2$ ):  $\delta = 8.00$  (d, 2H, Ar-*H*,  $J = 9.2$  Hz), 7.91 (m, 2H, Ar-*H*), 7.47-7.42 (m, 4H, Ar-*H*), 7.36 (ddd, 2H, Ar-*H*,  $J = 8.2, 6.7, 1.2$  Hz), 7.25 (t, 2H, Ar-*H*,  $J = 7.4$  Hz), 7.19 (d, 2H, Ar-*H*,  $J = 8.1$  Hz), 7.03 (t, 2H, Ar-*H*,  $J = 7.5$  Hz), 6.92 (t, 2H, Ar-*H*,  $J = 7.5$  Hz), 6.85 (d, 2H, Ar-*H*,  $J = 7.5$  Hz), 5.16-5.07 (m, 4H,  $-OCH_2-$ ) ppm.  $^{13}C$  NMR (125 MHz,  $CD_2Cl_2$ ):  $\delta = 154.3, 137.2, 134.7, 132.7, 130.1, 129.3, 128.7, 128.5, 127.8, 127.0, 125.8, 124.4, 121.9, 120.7, 115.8, 70.8$  ppm. HRMS (APCI-TOF) calcd for  $C_{34}H_{25}Br_2O_2$   $[M+H]^+$ : 623.0216; found: 623.0202.  $[\alpha]_D^{20} = +47$  ( $c = 1.00$ , THF).

### 2,2'-Bis(2-bromobenzyloxy)biphenyl (1b)

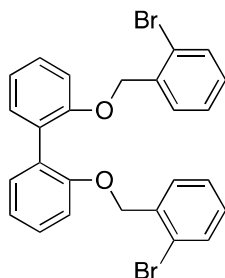

A solution of 2,2'-dihydroxybiphenyl (1.49 g, 8.00 mmol), 2-bromobenzyl bromide (6.00 g, 24.0 mmol), potassium carbonate (4.42 g, 32.0 mmol) in *N,N*-dimethylformamide (24 mL) was stirred at 70 °C for 11 h, followed by addition of water (ca. 50 mL). The mixture was extracted with diethyl ether, washed with water and brine, dried over  $Na_2SO_4$ , and concentrated. The residue was subjected to column chromatography on silica gel with hexane/ethyl acetate (100/1 to 100/2) to give a white solid (3.55 g, 6.77 mmol, 85% yield). Mp: 65-66 °C.  $^1H$  NMR (500 MHz,  $CD_2Cl_2$ ):  $\delta = 7.50$  (m, 2H, Ar-*H*), 7.35 (m, 4H, Ar-*H*), 7.19 (d, 2H, Ar-*H*,  $J = 6.8$  Hz), 7.09 (m, 6H, Ar-*H*), 7.01 (m, 2H, Ar-*H*), 5.06 (s, 4H,  $-OCH_2-$ ) ppm.  $^{13}C$  NMR (125 MHz,  $CD_2Cl_2$ ):  $\delta = 156.4, 137.1, 132.8, 132.1, 129.4, 129.3, 128.9, 128.7, 127.9, 122.0, 121.5, 113.0, 70.1$  ppm. HRMS (ESI-TOF) calcd for  $C_{26}H_{21}Br_2O_2$   $[M+H]^+$ : 522.9903; found: 522.9908.

### Macrocycle (S)-2a

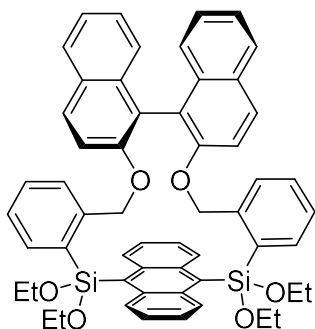

*n*BuLi in hexane (1.6 M, 4.5 mL, 7.2 mmol) was added dropwise to a suspension of (S)-2,2'-bis(2-bromobenzyloxy)-1,1'-binaphthyl (2.25 g, 3.60 mmol) in diethyl ether (36 mL) at -17 °C under Ar. After stirring at -17 °C for 1 h, 9,10-bis(triethoxysilyl)anthracene<sup>1</sup> (1.81 g, 3.60 mmol) in diethyl ether (36 mL) was added over 2 h at -17 °C, followed by stirring at room temperature for 19 h. The reaction mixture was quenched with aq. 1 M HCl. The organic layer was collected, washed with water and brine, dried over  $Na_2SO_4$ , and concentrated. The residue was subjected to column chromatography on silica gel with hexane/ethyl acetate (100:1 to 100:3) to give a pale yellow solid (1.75 g, 2.04 mmol, 57% yield). Mp: 123-127 °C  $^1H$  NMR (500 MHz,  $CD_2Cl_2$ ):  $\delta = 9.02$  (d, 2H,

Ar-H,  $J = 8.8$  Hz), 8.35 (d, 2H, Ar-H,  $J = 8.8$  Hz), 8.26 (d, 2H, Ar-H,  $J = 7.5$  Hz), 7.78 (d, 2H, Ar-H,  $J = 8.5$  Hz), 7.66 (d, 2H, Ar-H,  $J = 9.1$  Hz), 7.38 (m, 2H, Ar-H), 7.27 (m, 6H, Ar-H), 7.16 (m, 4H, Ar-H), 7.05 (d, 2H, Ar-H,  $J = 8.5$  Hz), 6.92 (d, 2H, Ar-H,  $J = 7.9$  Hz), 6.76 (d, 2H, Ar-H,  $J = 9.1$  Hz), 4.13 (d, 2H,  $-\text{OCH}_2-$ ,  $J = 14.5$  Hz), 4.00 (m, 2H,  $-\text{CH}_2-\text{CH}_3$ ), 3.89 (m, 6H,  $-\text{CH}_2-\text{CH}_3$ ), 3.63 (d, 2H,  $-\text{OCH}_2-$ ,  $J = 14.5$  Hz), 1.37 (t, 6H,  $-\text{CH}_2-\text{CH}_3$ ,  $J = 6.9$  Hz), 1.23 (t, 6H,  $-\text{CH}_2-\text{CH}_3$ ,  $J = 7.0$  Hz) ppm.  $^{13}\text{C}$  NMR (125 MHz,  $\text{CD}_2\text{Cl}_2$ ):  $\delta = 155.4, 143.9, 137.3, 137.1, 135.4, 134.1, 134.0, 132.6, 130.7, 130.4, 130.0, 129.8, 128.7, 128.5, 127.1, 126.8, 125.9, 125.8, 125.4, 125.2, 124.2, 120.6, 117.5, 73.0, 59.8, 18.73, 18.66$  ppm.  $^{29}\text{Si}$  NMR (99 MHz,  $\text{CD}_2\text{Cl}_2$ ):  $\delta = -31.1$  ppm. HRMS (ESI-TOF) calcd for  $\text{C}_{56}\text{H}_{52}\text{O}_6\text{Si}_2$   $[\text{M}]^+$ : 876.3297; found: 876.3306.  $[\alpha]_{\text{D}}^{20} = +14$  ( $c = 1.00$ , THF).

### Macrocycle (R)-2a

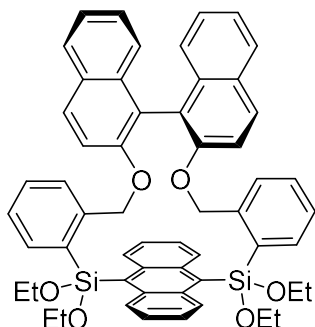

$n\text{BuLi}$  in hexane (1.6 M, 4.0 mL, 6.4 mmol) was added dropwise to a suspension of (R)-2,2'-bis(2-bromobenzoyloxy)-1,1'-binaphthyl (2.00 g, 3.20 mmol) in diethyl ether (32 mL) at 0 °C under Ar. After stirring at 0 °C for 15 min, 9,10-bis(triethoxysilyl)anthracene (1.61 g, 3.20 mmol) in diethyl ether (32 mL) was added over 40 min at 0 °C, followed by stirring at room temperature for 20 h. The reaction mixture was quenched with aq. 1 M HCl. The organic layer was collected, washed with water and brine, dried over  $\text{MgSO}_4$ , and concentrated. The residue was subjected to column chromatography on silica gel with hexane/toluene (2:1 to 2:3) to give a pale yellow solid (0.647 g, 0.738 mmol, 23% yield). Mp: 127-130 °C.  $^1\text{H}$  NMR (500 MHz,  $\text{CD}_2\text{Cl}_2$ ):  $\delta = 9.03$  (d, 2H, Ar-H,  $J = 9.2$  Hz), 8.34 (d, 2H, Ar-H,  $J = 8.6$  Hz), 8.26 (d, 2H, Ar-H,  $J = 7.2$  Hz), 7.78 (d, 2H, Ar-H,  $J = 8.6$  Hz), 7.67 (d, 2H, Ar-H,  $J = 8.6$  Hz), 7.39 (t, 2H, Ar-H,  $J = 7.2$  Hz), 7.33-7.23 (m, 6H, Ar-H), 7.17 (t, 2H, Ar-H,  $J = 7.6$  Hz), 7.13 (t, 2H, Ar-H,  $J = 7.6$  Hz), 7.04 (d, 2H, Ar-H,  $J = 8.6$  Hz), 6.93 (d, 2H, Ar-H,  $J = 8.0$  Hz), 6.76 (d, 2H, Ar-H,  $J = 9.2$  Hz), 4.13 (d, 2H,  $-\text{OCH}_2-$ ,  $J = 14.9$  Hz), 4.04-3.97 (m, 2H,  $-\text{CH}_2-\text{CH}_3$ ), 3.94-3.83 (m, 6H,  $-\text{CH}_2-\text{CH}_3$ ), 3.62 (d, 2H,  $-\text{OCH}_2-$ ,  $J = 14.9$  Hz), 1.37 (t, 6H,  $-\text{CH}_2-\text{CH}_3$ ,  $J = 6.9$  Hz), 1.23 (t, 6H,  $-\text{CH}_2-\text{CH}_3$ ,  $J = 6.9$  Hz) ppm.  $^{13}\text{C}$  NMR (125 MHz,  $\text{CD}_2\text{Cl}_2$ ):  $\delta = 155.3, 143.9, 137.2, 137.1, 135.3, 134.1, 133.9, 132.6, 130.7, 130.4, 130.0, 128.7, 128.4, 127.1, 126.7, 125.9, 125.8, 125.4, 125.2, 124.2, 120.6, 117.4, 72.9, 59.8, 18.72, 18.65$  ppm. HRMS (APCI-TOF) calcd for  $\text{C}_{56}\text{H}_{53}\text{O}_6\text{Si}_2$   $[\text{M}+\text{H}]^+$ : 877.3375; found: 877.3359.  $[\alpha]_{\text{D}}^{20} = -14$  ( $c = 1.00$ , THF)

### Macrocycle 2b

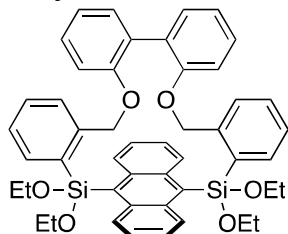

$n\text{BuLi}$  in hexane (1.6 M, 2.5 mL, 4.0 mmol) was added dropwise to a suspension of 2,2'-bis(2-bromobenzoyloxy)biphenyl (1.05 g, 2.00 mmol) in diethyl ether (40 mL) at -17 °C under Ar. After stirring at -17 °C for 1 h, 9,10-bis(triethoxysilyl)anthracene (1.01 g, 2.00 mmol) in diethyl ether (40 mL) was added over 2 h at -17 °C, followed by stirring at room temperature for 19 h. The reaction mixture was quenched with aq. 1 M HCl. The organic layer was collected, washed with water and brine, dried over  $\text{Na}_2\text{SO}_4$ , and concentrated. The residue was subjected to column chromatography on silica gel with hexane/toluene (3/1 to 1/1) to give a pale yellow solid (0.296 g, 0.381 mmol, 19% yield). Mp: 208-210 °C.  $^1\text{H}$  NMR (500 MHz,  $\text{CD}_2\text{Cl}_2$ ):  $\delta = 9.17$  (d, 2H, Ar-H,  $J = 9.1$  Hz), 8.33 (dd, 2H, Ar-H,  $J = 7.4, 1.1$  Hz), 8.21 (d, 2H, Ar-H,  $J = 8.8$  Hz), 7.43 (t, 2H, Ar-H,  $J = 7.3$  Hz), 7.34 (m, 4H, Ar-H), 7.13 (dd, 2H, Ar-H,  $J = 7.4, 1.7$  Hz), 7.06 (m, 6H, Ar-H), 6.91 (td, 2H, Ar-H,  $J = 7.4, 1.0$  Hz), 6.38 (dd, 2H, Ar-H,  $J = 8.2, 1.0$  Hz), 4.29 (d, 2H,  $-\text{OCH}_2-$ ,  $J = 15.8$  Hz), 4.22 (m, 2H,  $-\text{CH}_2-\text{CH}_3$ ), 4.12 (dq, 2H,  $-\text{CH}_2-\text{CH}_3$ ,  $J = 10.3, 7.0$  Hz), 4.01 (dq, 2H,  $-\text{CH}_2-\text{CH}_3$ ,  $J = 10.2, 7.0$  Hz), 3.82 (dq, 2H,  $-\text{CH}_2-\text{CH}_3$ ,  $J = 10.2, 7.0$  Hz), 3.45 (d, 2H,  $-\text{OCH}_2-$ ,  $J = 16.1$  Hz), 1.38 (br, t, 6H,  $-\text{CH}_2-\text{CH}_3$ ,  $J = 7.1$  Hz), 1.36 (br, t, 6H,  $-\text{CH}_2-\text{CH}_3$ ,  $J = 7.1$  Hz) ppm.  $^{13}\text{C}$  NMR (125 MHz,  $\text{CD}_2\text{Cl}_2$ ):  $\delta = 157.5, 144.0, 137.2, 135.5, 134.0, 131.9, 131.2, 130.79, 130.77, 129.1, 128.9, 128.2, 126.9, 125.6, 125.3, 124.4, 121.7, 114.2, 72.7, 60.1, 59.8, 18.8, 18.7$  ppm.  $^{29}\text{Si}$  NMR (99 MHz,  $\text{CD}_2\text{Cl}_2$ ):  $\delta = -32.0$  ppm. HRMS (ESI-TOF) calcd for  $\text{C}_{48}\text{H}_{48}\text{O}_6\text{Si}_2$   $[\text{M}]^+$ : 776.2984; found: 776.2984.

### Macrocycle (S)-3a

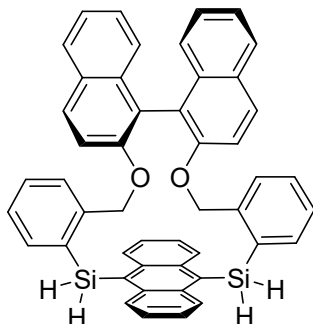

Macrocycle **(S)-2a** (1.36 g, 1.60 mmol) in diethyl ether (3.2 mL) was added dropwise to a suspension of lithium aluminium hydride (0.121 g, 3.20 mmol) in diethyl ether (3.2 mL) at 0 °C under Ar. After stirring at room temperature for 11.5 h, the reaction mixture was quenched with aq. 1 M HCl. The mixture was extracted with diethyl ether, washed with water and brine, dried over Na<sub>2</sub>SO<sub>4</sub>, and concentrated. The residue was subjected to column chromatography on silica gel with hexane/toluene (3:1 to 1:1) to give a pale yellow solid (0.715 g, 1.02 mmol, 64% yield). Mp: 210-212 °C. <sup>1</sup>H NMR (500 MHz, CD<sub>2</sub>Cl<sub>2</sub>): δ = 8.65 (d, 2H, Ar-H, J = 9.1 Hz), 8.15 (d, 2H, Ar-H, J = 8.8 Hz), 7.97 (d, 2H, Ar-H, J = 7.2 Hz), 7.76 (d, 2H, Ar-H, J = 8.2 Hz), 7.62 (d, 2H, Ar-H, J = 8.8 Hz), 7.46 (t, 2H, Ar-H, J = 7.7 Hz), 7.30 (m, 6H, Ar-H), 7.23 (ddd, 2H, Ar-H, J = 8.4, 6.8, 1.3 Hz), 7.10 (m, 4H, Ar-H), 6.74-6.63 (m, 4H, Ar-H), 5.87 (d, 2H, -SiH<sub>2</sub>-, J = 4.1 Hz), 5.40 (d, 2H, -SiH<sub>2</sub>-, J = 4.4 Hz), 4.15 (d, 2H, -OCH<sub>2</sub>-, J = 12.3 Hz), 3.95 (d, 2H, -OCH<sub>2</sub>-, J = 12.6 Hz) ppm. <sup>13</sup>C NMR (125 MHz, CD<sub>2</sub>Cl<sub>2</sub>): δ = 154.7, 144.3, 137.3, 137.0, 136.8, 134.1, 132.1, 131.3, 130.8, 130.2, 129.6, 129.3, 128.4, 128.0, 127.8, 126.7, 126.3, 126.0, 125.8, 124.4, 121.2, 117.8, 72.9 ppm. <sup>29</sup>Si NMR (99 MHz, CD<sub>2</sub>Cl<sub>2</sub>): δ = -45.7 ppm. HRMS (ESI-TOF) calcd for C<sub>48</sub>H<sub>36</sub>O<sub>2</sub>Si<sub>2</sub>Na [M+Na]<sup>+</sup>: 723.2146; found: 723.2144. [α]<sub>D</sub><sup>20</sup> = -32 (c = 1.00, THF).

### Macrocycle (R)-3a

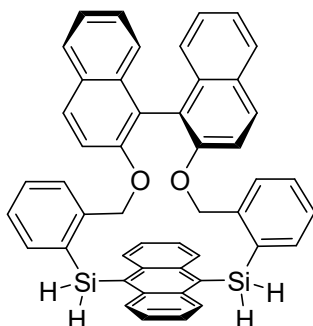

Macrocycle **(R)-2a** (0.526 g, 0.600 mmol) in diethyl ether (3.0 mL) was added dropwise to a suspension of lithium aluminium hydride (45.5 mg, 1.20 mmol) in diethyl ether (3.0 mL) at 0 °C under Ar. After stirring at room temperature for 9 h, the reaction mixture was quenched with aq. 1 M HCl. The mixture was extracted with diethyl ether, washed with water and brine, dried over MgSO<sub>4</sub>, and concentrated. The residue was subjected to column chromatography on silica gel with hexane/toluene (3:1 to 1:1) to give a pale yellow solid (0.279 g, 0.398 mmol, 66% yield). Mp: 210-212 °C. <sup>1</sup>H NMR (500 MHz, CD<sub>2</sub>Cl<sub>2</sub>): δ = 8.64 (d, 2H, Ar-H, J = 9.2 Hz), 8.13 (d, 2H, Ar-H, J = 8.6 Hz), 7.96 (dd, 2H, Ar-H, J = 7.5, 1.2 Hz), 7.75 (d, 2H, Ar-H, J = 8.6 Hz), 7.62 (d, 2H, Ar-H, J = 8.6 Hz), 7.48-7.43 (m, 2H, Ar-H), 7.32-7.26 (m, 6H, Ar-H), 7.22 (t, 2H, Ar-H, J = 7.5 Hz), 7.12-7.05 (m, 4H, Ar-H), 6.69 (d, 2H, Ar-H, J = 8.6 Hz), 6.65 (d, 2H, Ar-H, J = 7.5 Hz), 5.86 (d, 2H, -SiH<sub>2</sub>-, J = 4.6 Hz), 5.39 (d, 2H, -SiH<sub>2</sub>-, J = 4.6 Hz), 4.14 (d, 2H, -OCH<sub>2</sub>-, J = 12.6 Hz), 3.93 (d, 2H, -OCH<sub>2</sub>-, J = 12.6 Hz) ppm. <sup>13</sup>C NMR (125 MHz, CD<sub>2</sub>Cl<sub>2</sub>): δ = 154.6, 144.2, 137.3, 136.9, 136.7, 134.0, 132.1, 131.2, 130.8, 130.1, 129.6, 129.3, 128.3, 127.9, 127.7, 126.7, 126.3, 125.9, 125.8, 124.4, 121.1, 117.7, 72.9 ppm. HRMS (APCI-TOF) calcd for C<sub>48</sub>H<sub>37</sub>O<sub>2</sub>Si<sub>2</sub> [M+H]<sup>+</sup>: 701.2327; found: 701.2357. [α]<sub>D</sub><sup>20</sup> = +35 (c = 1.00, THF).

### Macrocycle 3b

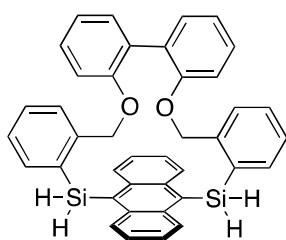

Macrocycle **2b** (0.233 g, 0.300 mmol) in diethyl ether (24 mL) and THF (3.0 mL) was added dropwise to a suspension of lithium aluminium hydride (22.8 mg, 0.600 mmol) in diethyl ether (3.0 mL) at 0 °C under Ar. After stirring at room temperature for 21 h, the reaction mixture was quenched with aq. 1 M HCl. The mixture was extracted with THF, washed with brine, dried over Na<sub>2</sub>SO<sub>4</sub>, and concentrated. The residue was recrystallized from dichloromethane/ethanol to give a pale yellow solid (0.129 g, 0.215 mmol,

72% yield). The single crystal for X-ray analysis was obtained by recrystallization from dichloromethane/hexane. Mp: 265-267 °C  
 $^1\text{H}$  NMR (500 MHz,  $\text{CD}_2\text{Cl}_2$ ):  $\delta$  = 8.69 (d, 2H, Ar-*H*,  $J$  = 8.7 Hz), 8.08 (m, 4H, Ar-*H*), 7.42 (m, 6H, Ar-*H*), 7.22 (m, 4H, Ar-*H*), 7.03 (dd, 2H, Ar-*H*,  $J$  = 7.4, 1.7 Hz), 6.94 (m, 2H, Ar-*H*), 6.74 (td, 2H, Ar-*H*,  $J$  = 7.5, 1.1 Hz), 6.43 (dd, 2H, Ar-*H*,  $J$  = 8.4, 1.0 Hz), 5.93 (d, 2H, - $\text{SiH}_2$ -,  $J$  = 4.4 Hz), 5.51 (d, 2H, - $\text{SiH}_2$ -,  $J$  = 4.4 Hz), 4.27 (d, 2H, - $\text{OCH}_2$ -,  $J$  = 13.6 Hz), 3.96 (d, 2H, - $\text{OCH}_2$ -,  $J$  = 13.6 Hz) ppm.  $^{13}\text{C}$  NMR (125 MHz,  $\text{CD}_2\text{Cl}_2$ ):  $\delta$  = 156.5, 144.5, 137.4, 137.2, 136.5, 131.9, 131.5, 131.0, 130.8, 129.4, 129.1, 128.8, 128.0, 127.8, 126.8, 126.4, 125.8, 121.3, 114.4, 72.4 ppm.  $^{29}\text{Si}$  NMR (99 MHz,  $\text{CD}_2\text{Cl}_2$ ):  $\delta$  = -46.1 ppm. HRMS (ESI-TOF) calcd for  $\text{C}_{40}\text{H}_{32}\text{O}_2\text{Si}_2\text{Na}$   $[\text{M}+\text{Na}]^+$ : 623.1833; found: 623.1845.  $T_{d1}$  = 252 °C.  $T_{d5}$  = 333 °C.

### 3. NMR Spectra

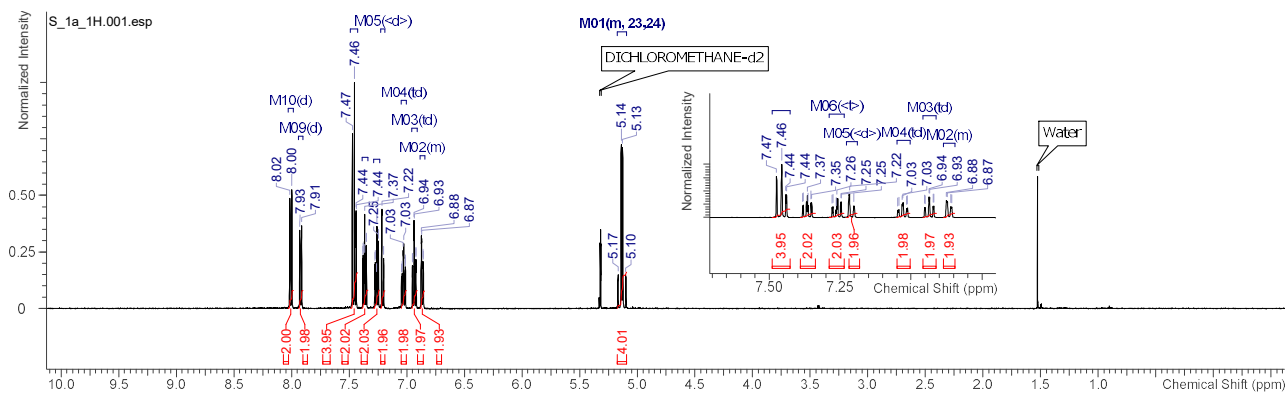

Fig. S2  $^1\text{H}$  NMR spectrum of (S)-1a (20 °C,  $\text{CD}_2\text{Cl}_2$ ).

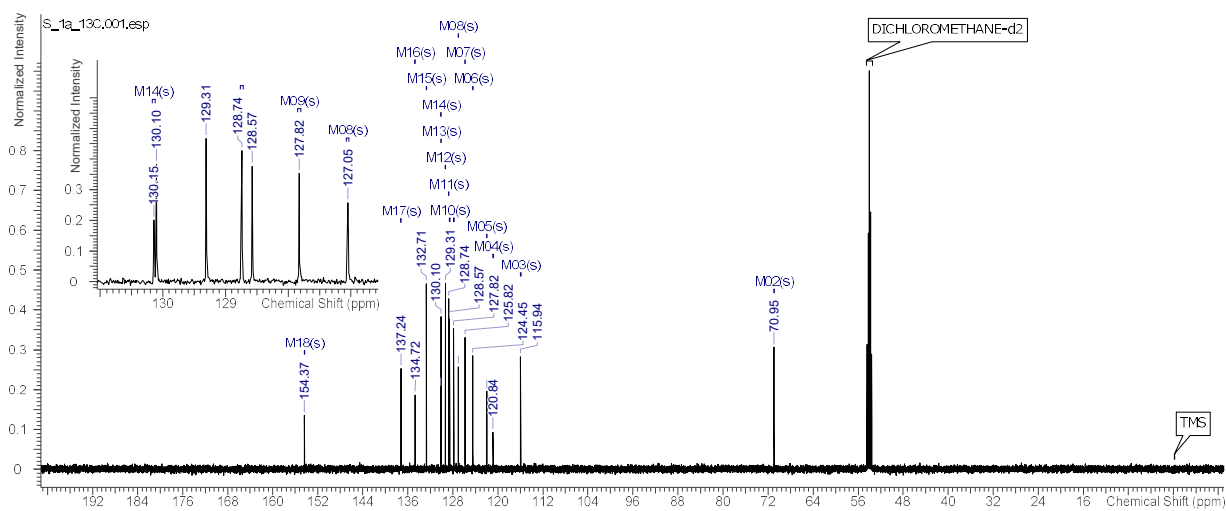

Fig. S3  $^{13}\text{C}$  NMR spectrum of (S)-1a (20 °C,  $\text{CD}_2\text{Cl}_2$ ).



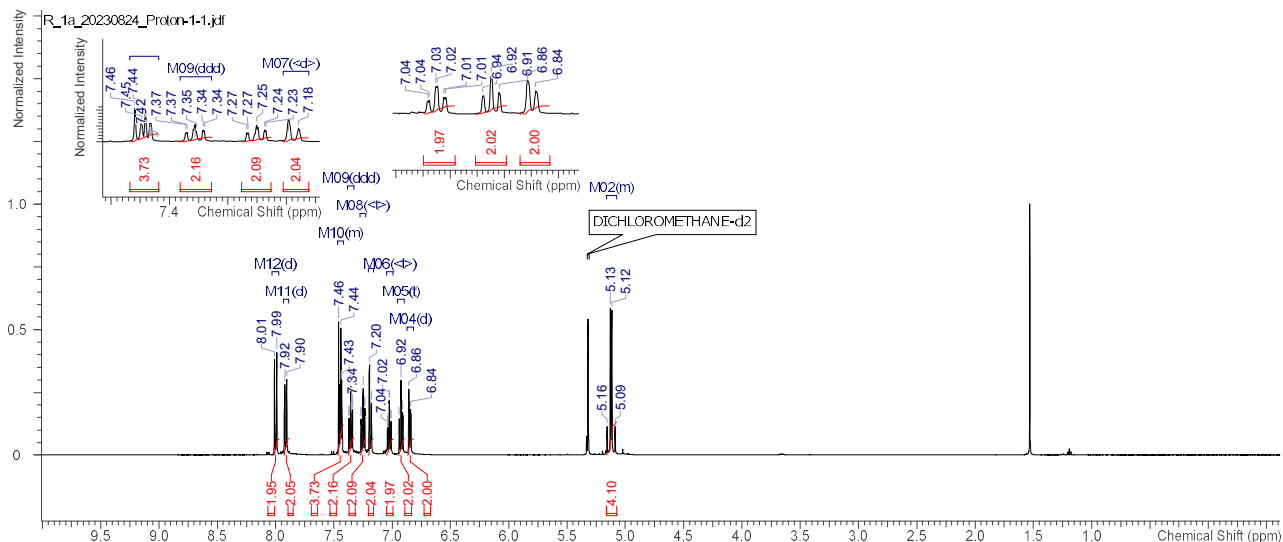

**Fig. S4**  $^1\text{H}$  NMR spectrum of  $(R)\text{-}1\text{a}$  ( $20^\circ\text{C}$ ,  $\text{CD}_2\text{Cl}_2$ ).

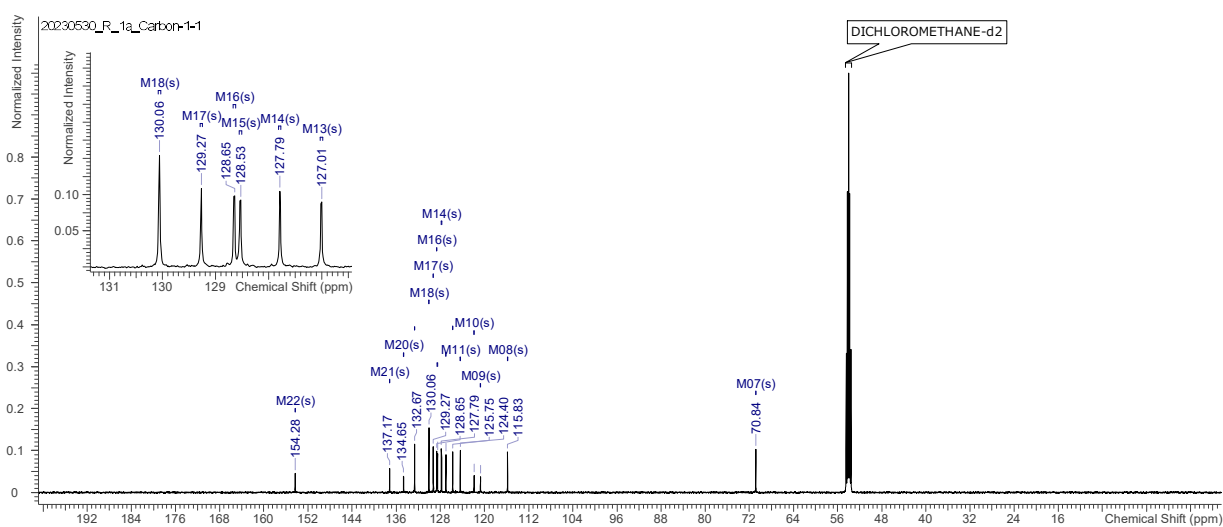

**Fig. S5**  $^{13}\text{C}$  NMR spectrum of  $(R)\text{-}1\text{a}$  ( $20^\circ\text{C}$ ,  $\text{CD}_2\text{Cl}_2$ ).

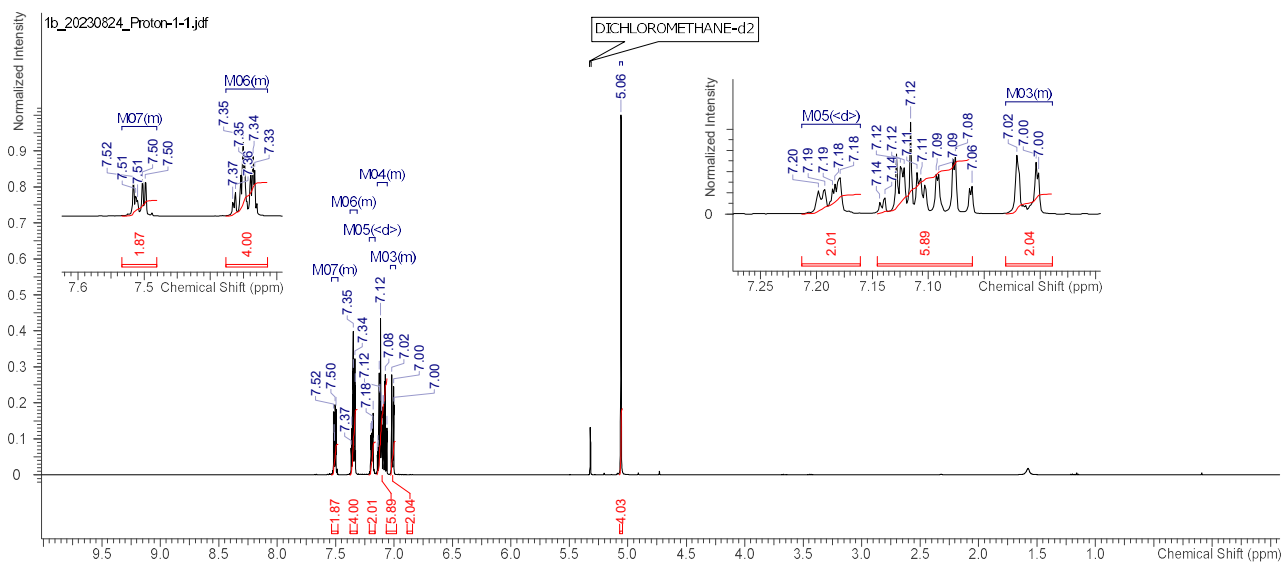

**Fig. S6**  $^1\text{H}$  NMR spectrum of **1b** (20 °C,  $\text{CD}_2\text{Cl}_2$ ).

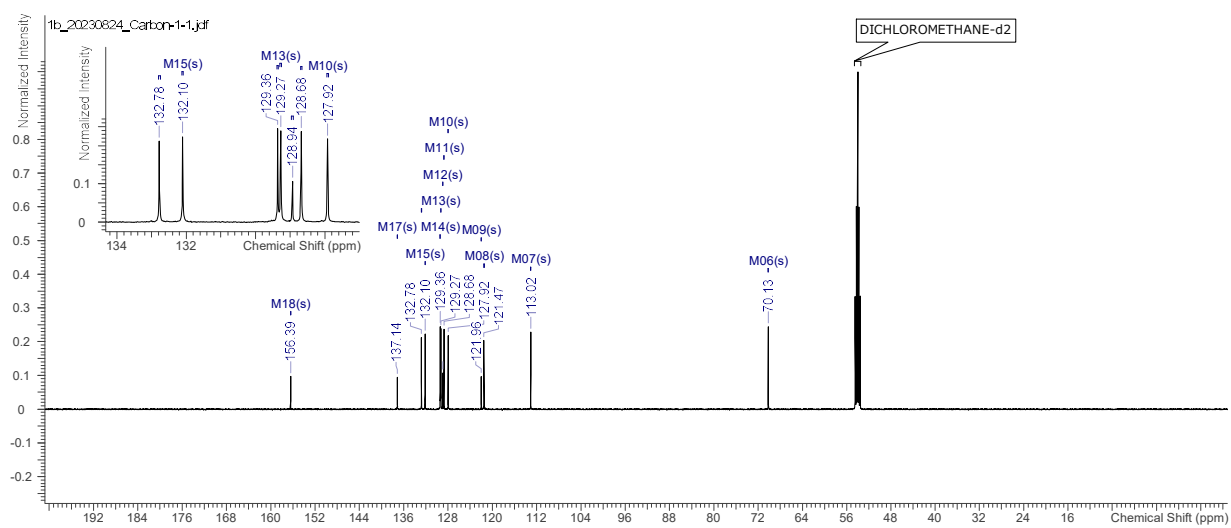

**Fig. S7**  $^{13}\text{C}$  NMR spectrum of **1b** (20 °C,  $\text{CD}_2\text{Cl}_2$ ).

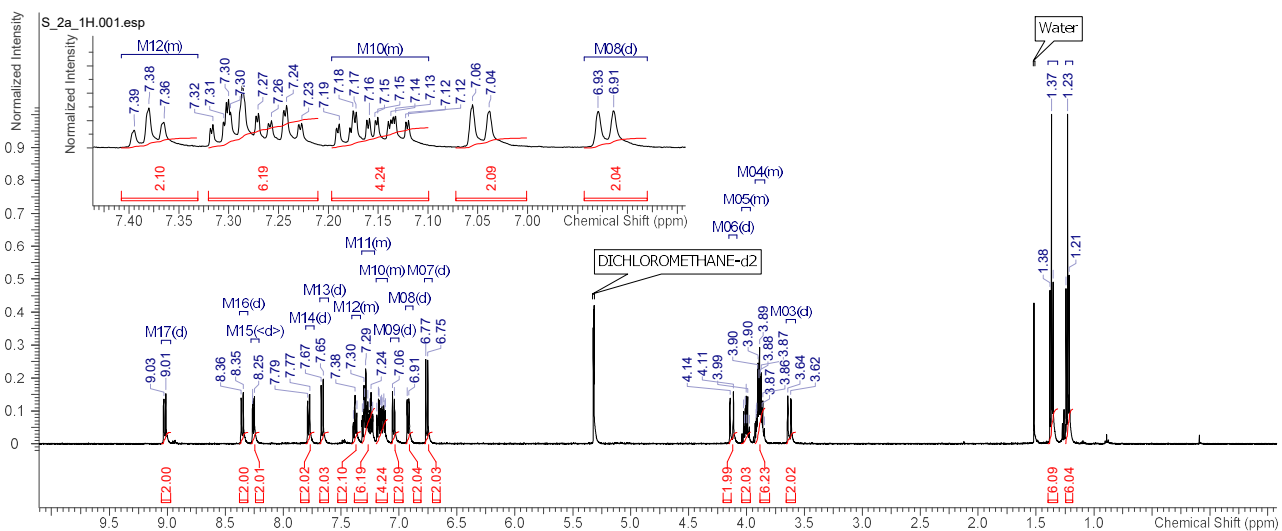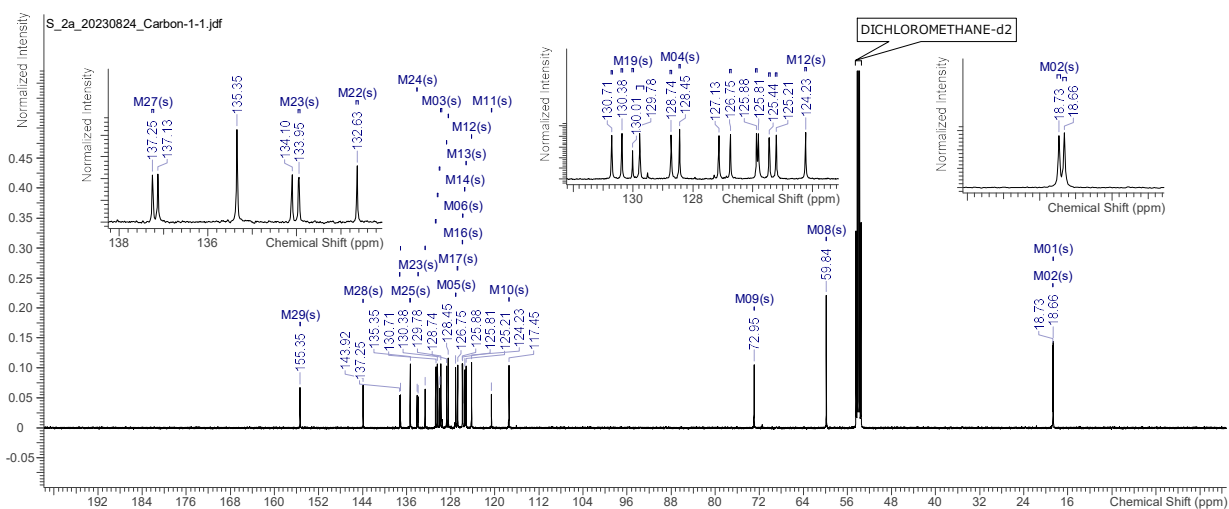

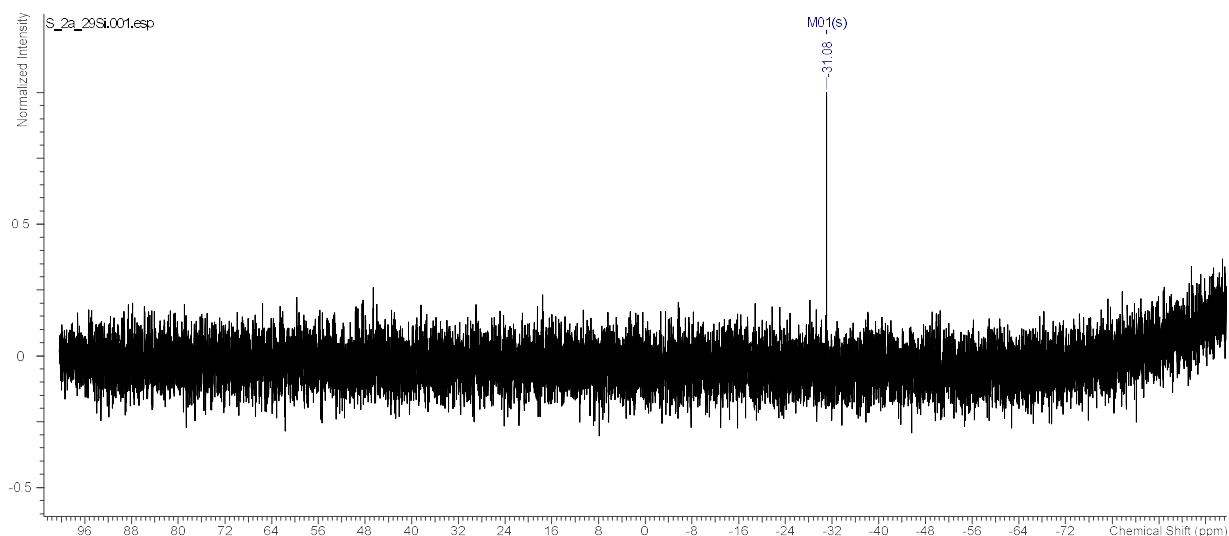

Fig. S10  $^{29}\text{Si}$  NMR spectrum of (*S*)-**2a** (20 °C,  $\text{CD}_2\text{Cl}_2$ ).

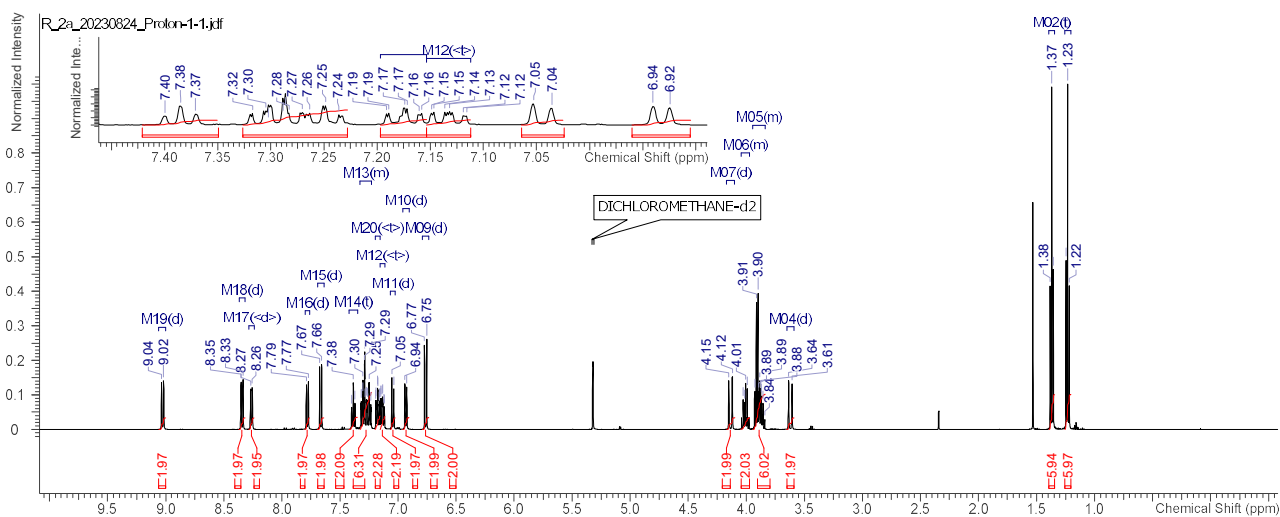

Fig. S11  $^1\text{H}$  NMR spectrum of (*R*)-**2a** (20 °C,  $\text{CD}_2\text{Cl}_2$ ).

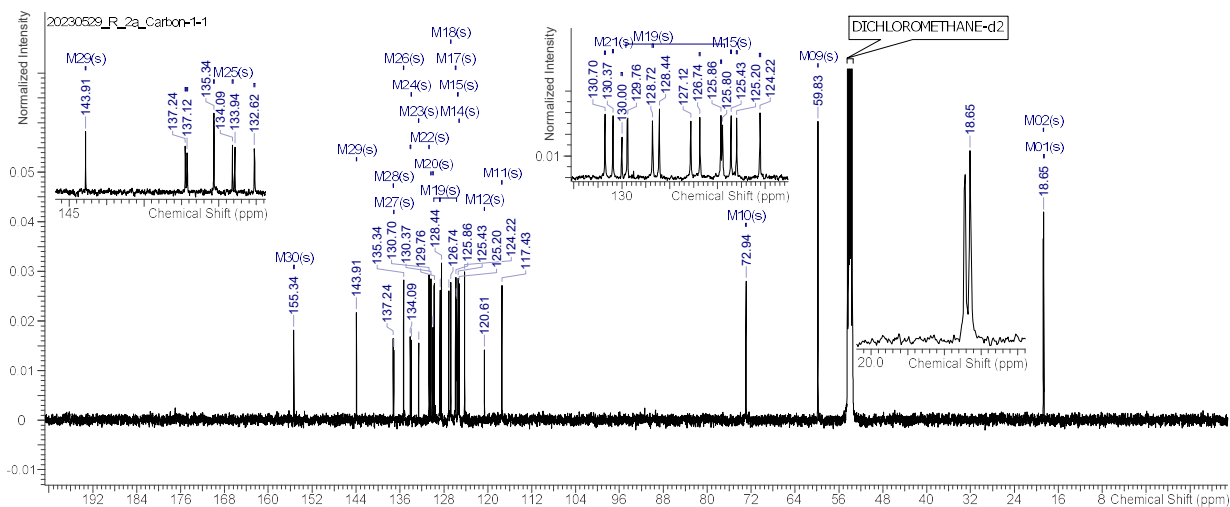

Fig. S12 <sup>13</sup>C NMR spectrum of (*R*)-2a (20 °C, CD<sub>2</sub>Cl<sub>2</sub>).

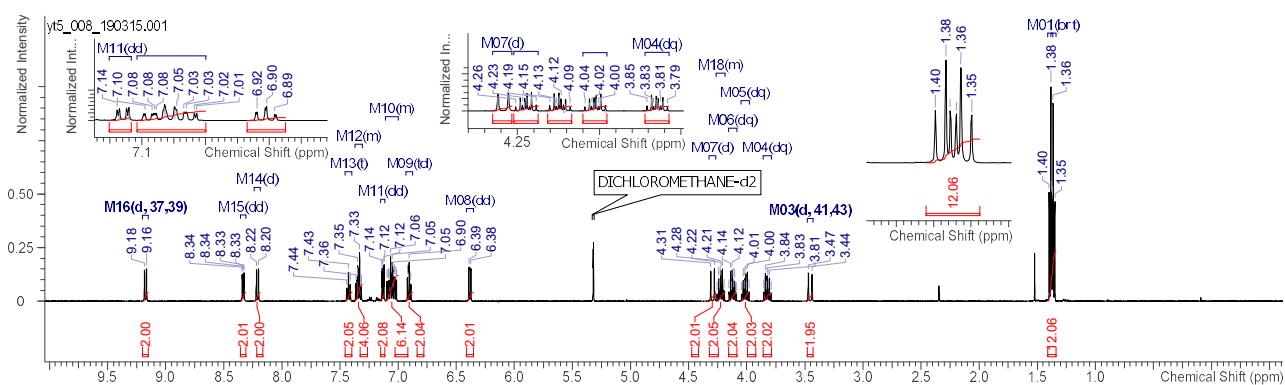

Fig. S13 <sup>1</sup>H NMR spectrum of 2b (20 °C, CD<sub>2</sub>Cl<sub>2</sub>).

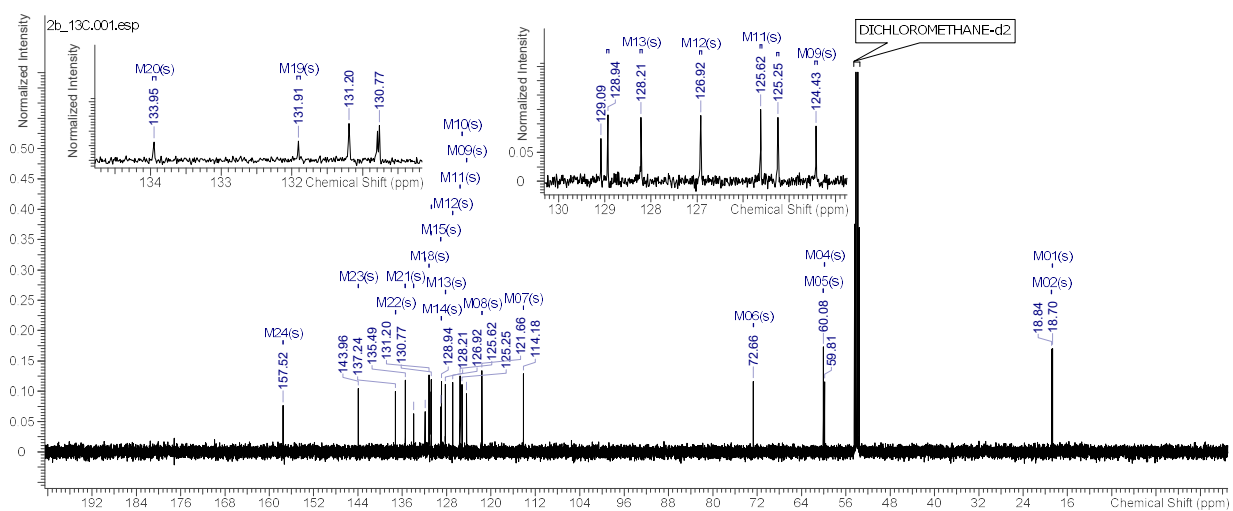

Fig. S14  $^{13}\text{C}$  NMR spectrum of **2b** (20  $^{\circ}\text{C}$ ,  $\text{CD}_2\text{Cl}_2$ ).

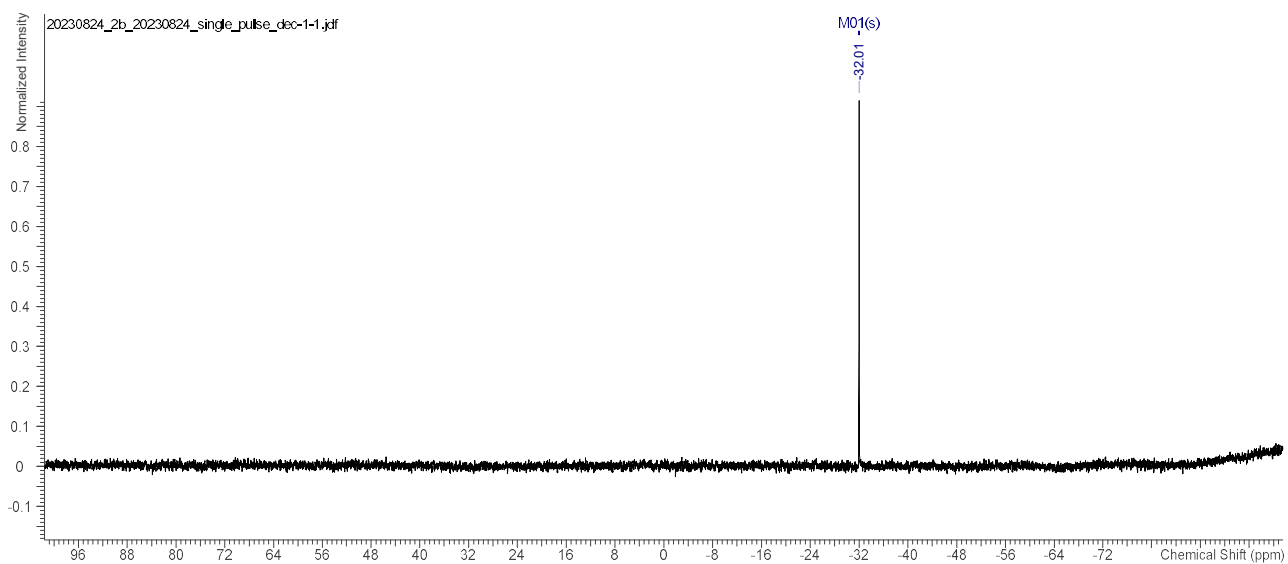

Fig. S15  $^{29}\text{Si}$  NMR spectrum of **2b** (20  $^{\circ}\text{C}$ ,  $\text{CD}_2\text{Cl}_2$ ).

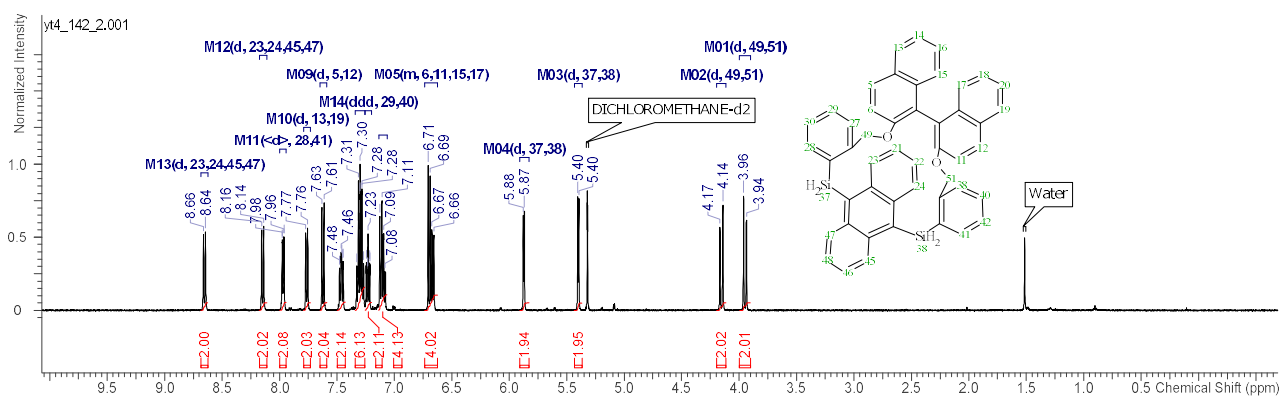

Fig. S16  $^1\text{H}$  NMR spectrum of (*S*)-**3a** (20 °C,  $\text{CD}_2\text{Cl}_2$ ).

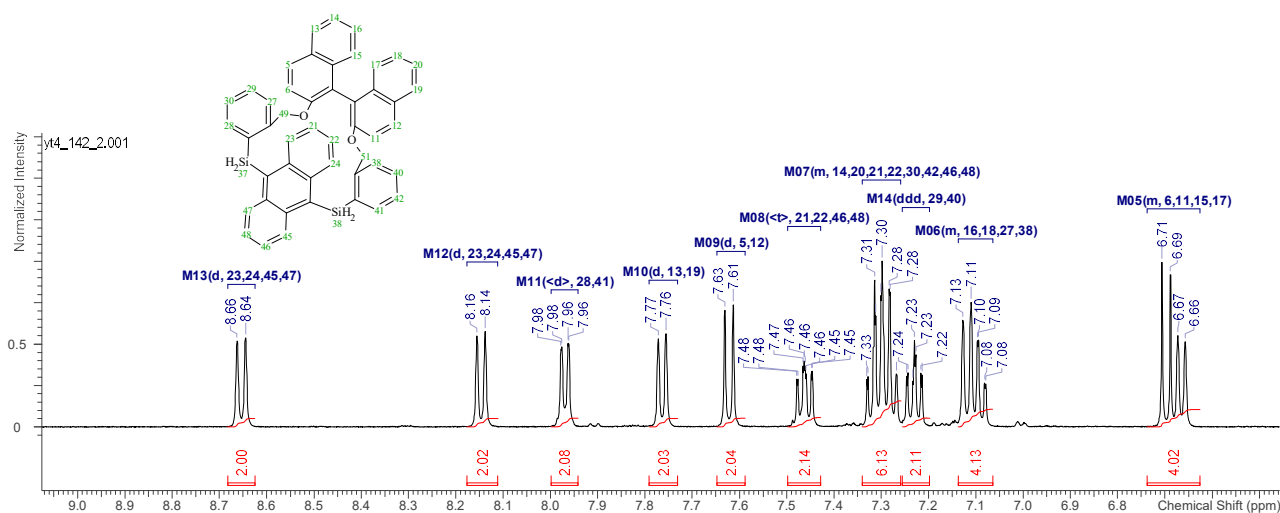

Fig. S17 Extended  $^1\text{H}$  NMR spectrum of (*S*)-**3a** (20 °C,  $\text{CD}_2\text{Cl}_2$ ).

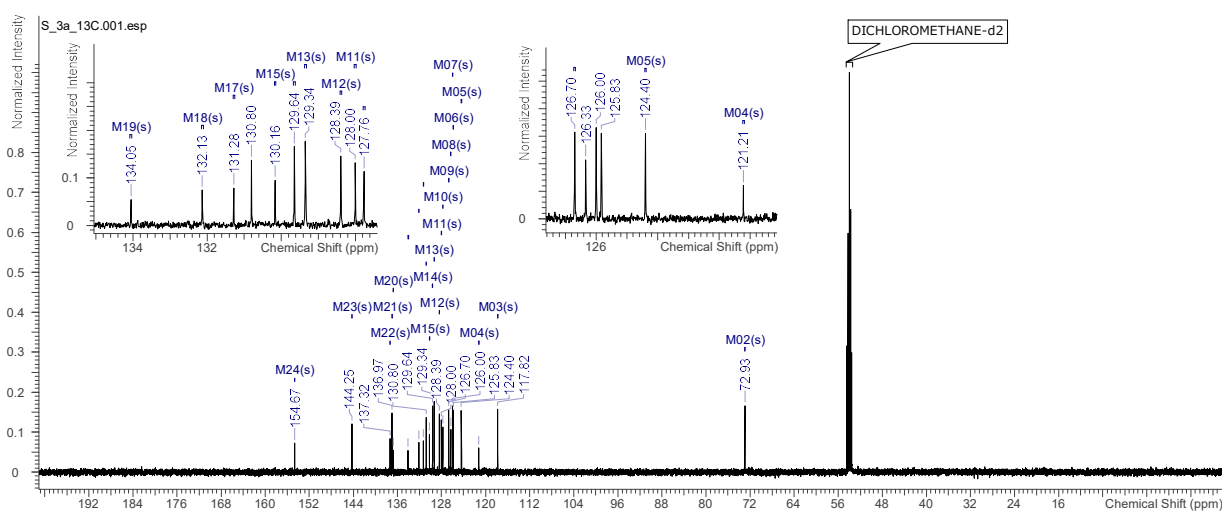

Fig. S18  $^{13}\text{C}$  NMR spectrum of (*S*)-**3a** (20 °C,  $\text{CD}_2\text{Cl}_2$ ).

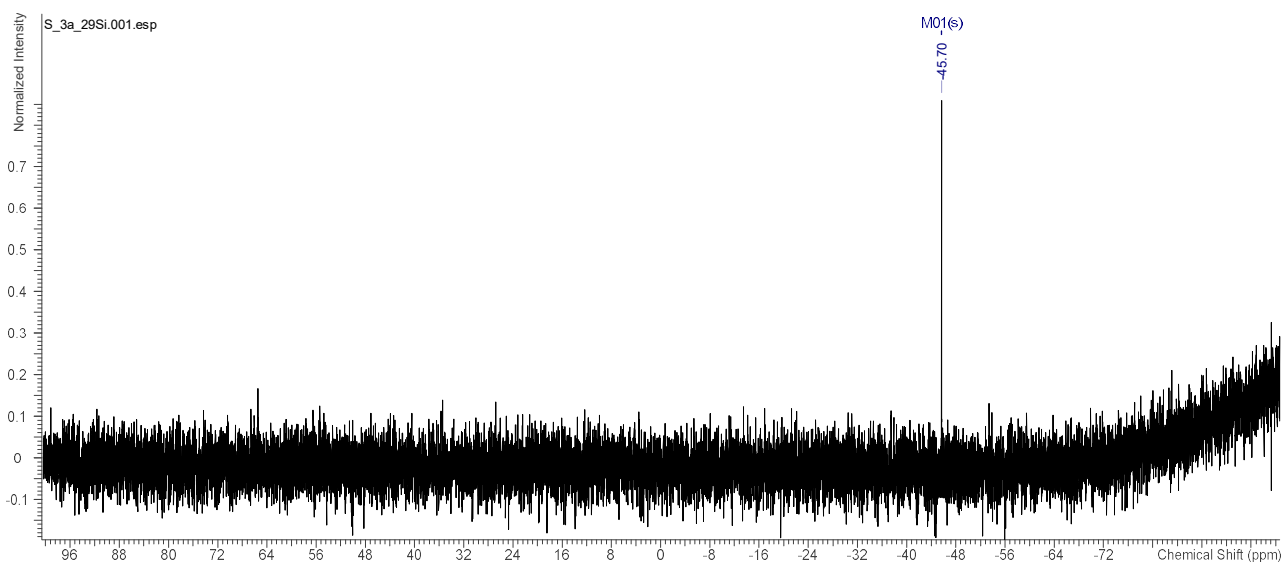

Fig. S19  $^{29}\text{Si}$  NMR spectrum of (S)-3a (20 °C,  $\text{CD}_2\text{Cl}_2$ ).

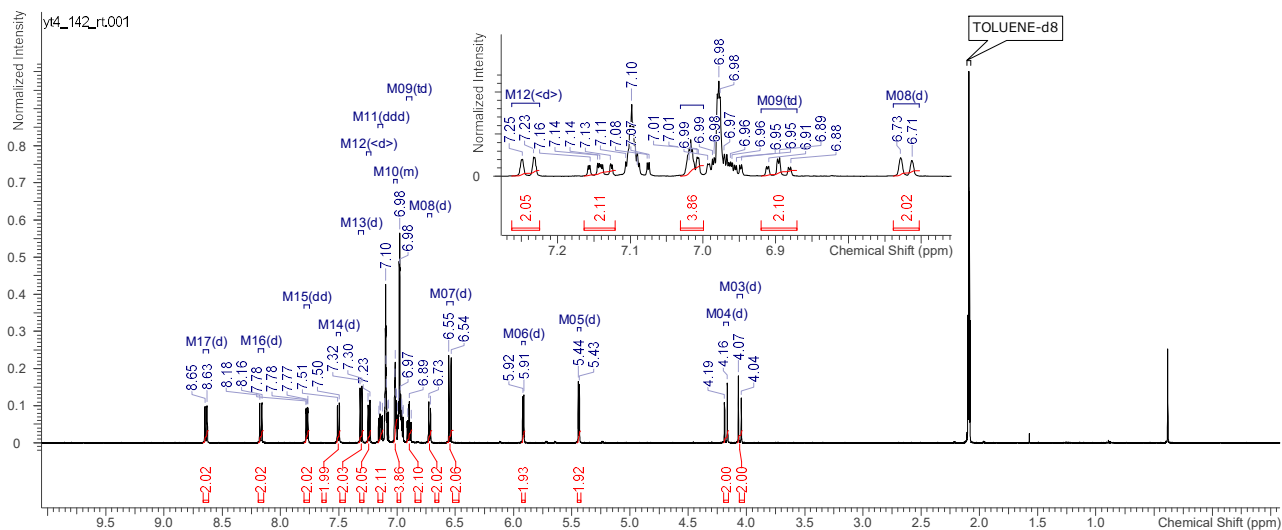

Fig. S20  $^1\text{H}$  NMR spectrum of (S)-3a (20 °C, toluene- $d_8$ ).



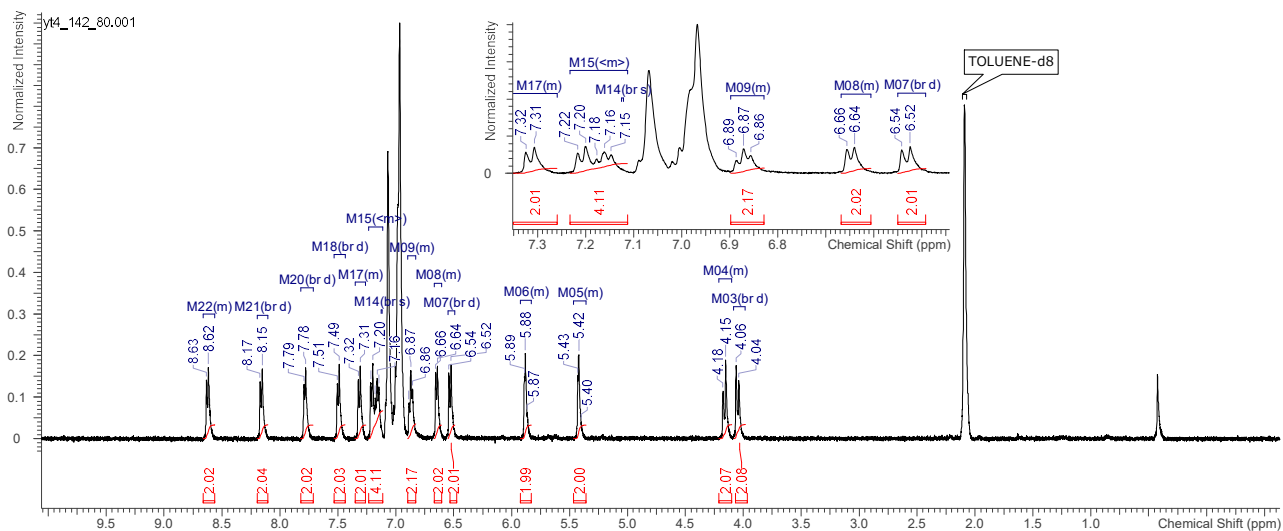

Fig. S21 <sup>1</sup>H NMR spectrum of (S)-3a (80 °C, toluene-d<sub>8</sub>).

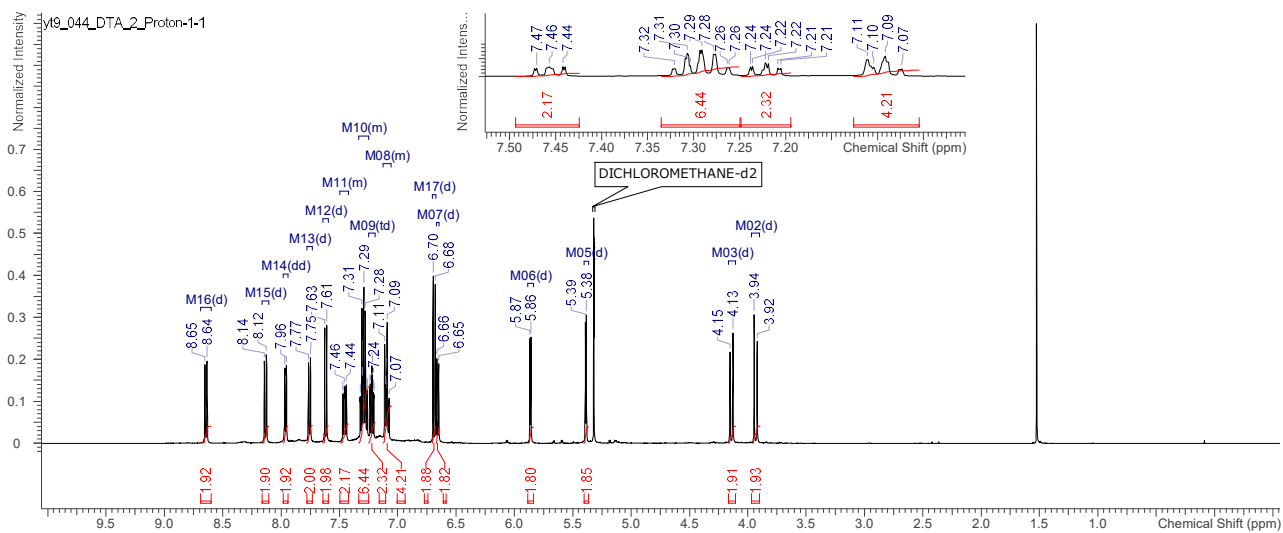

Fig. S22 <sup>1</sup>H NMR spectrum of (S)-3a after heating to 220 °C (20 °C, CD<sub>2</sub>Cl<sub>2</sub>).

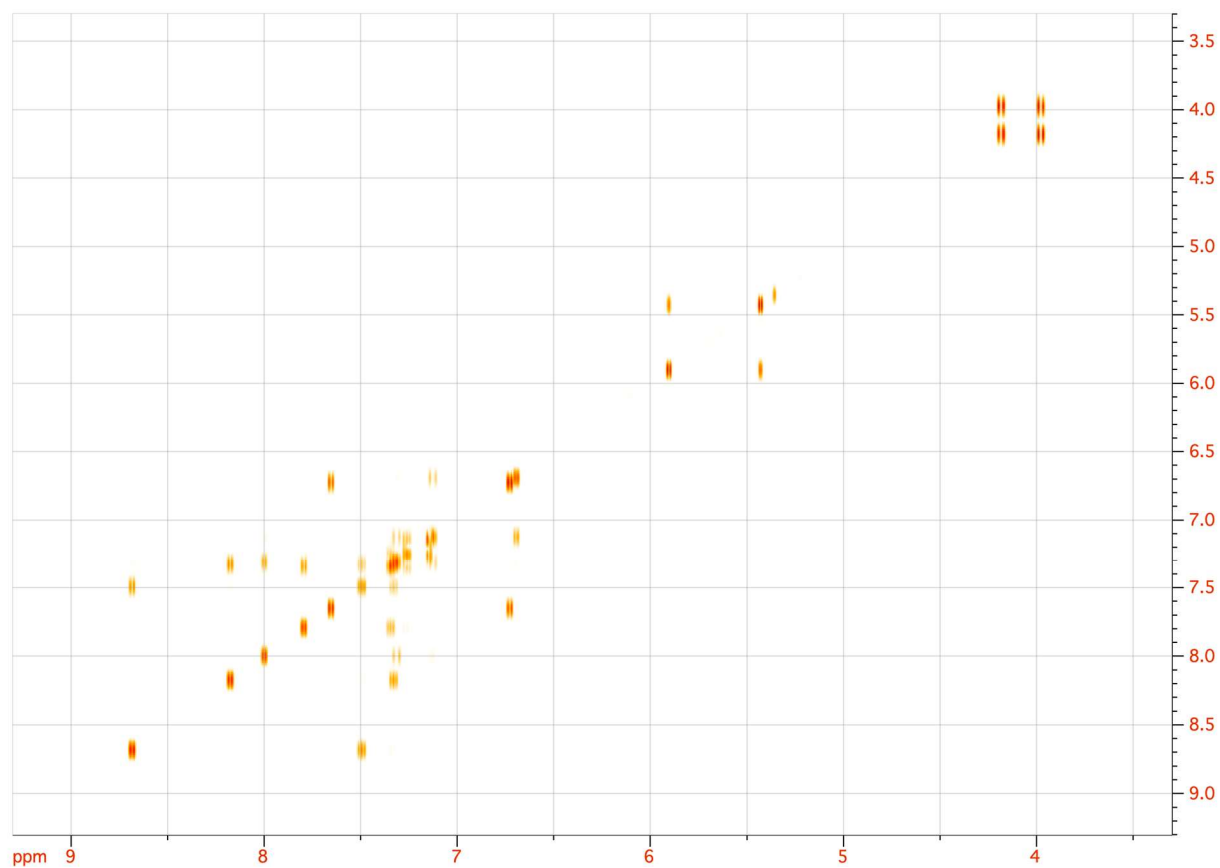

**Fig. S23** H-H COSY spectrum of (*S*)-**3a** (20 °C, CD<sub>2</sub>Cl<sub>2</sub>).

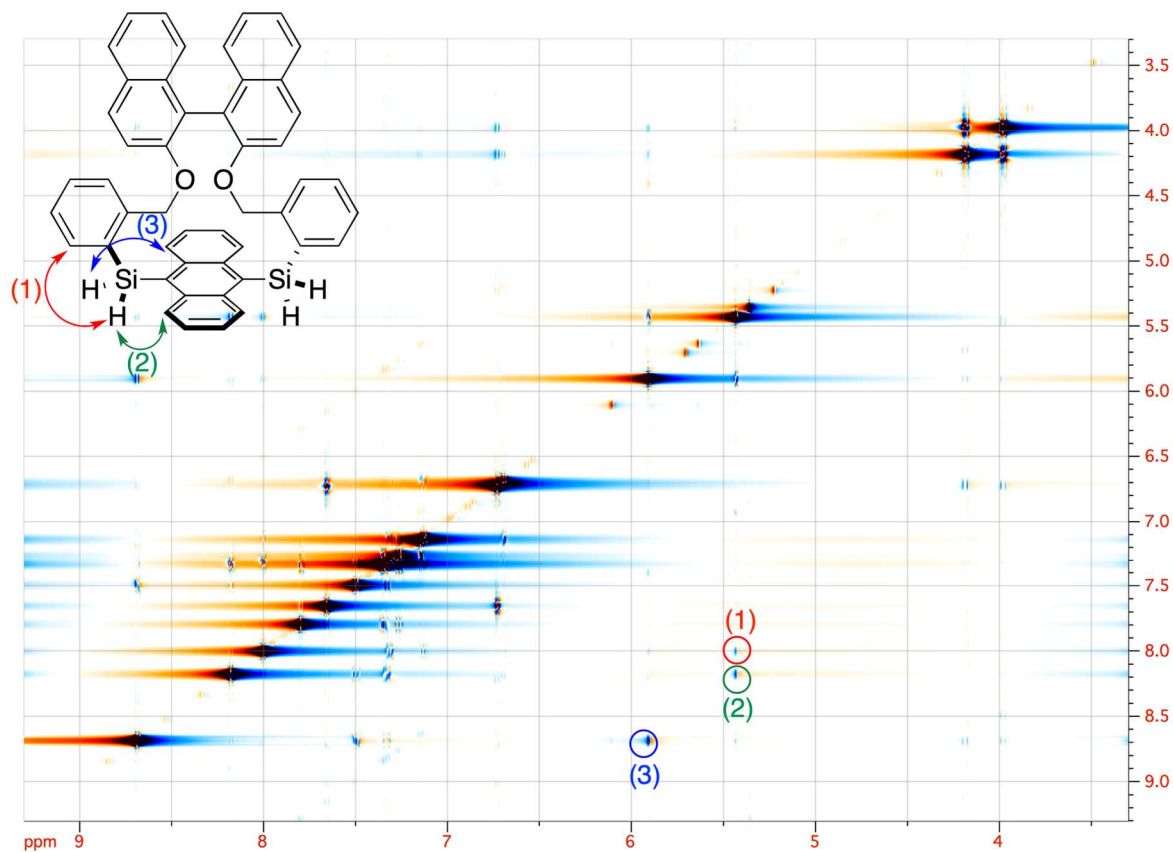

Fig. S24 NOESY spectrum of (S)-3a (20 °C, CD<sub>2</sub>Cl<sub>2</sub>).

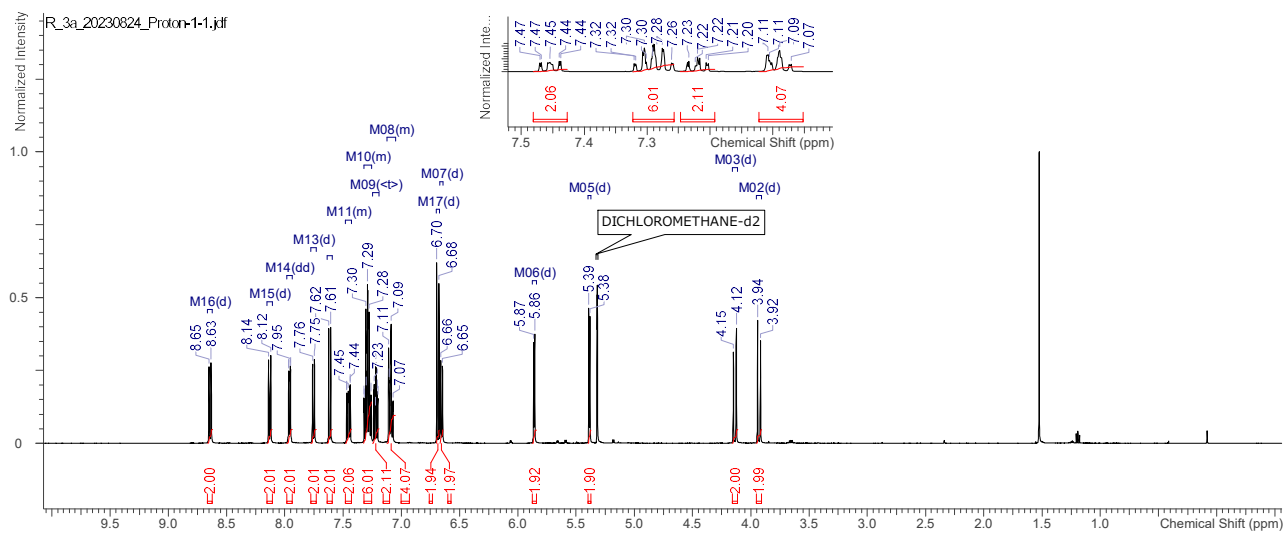

Fig. S25 <sup>1</sup>H NMR spectrum of (R)-3a (20 °C, CD<sub>2</sub>Cl<sub>2</sub>).

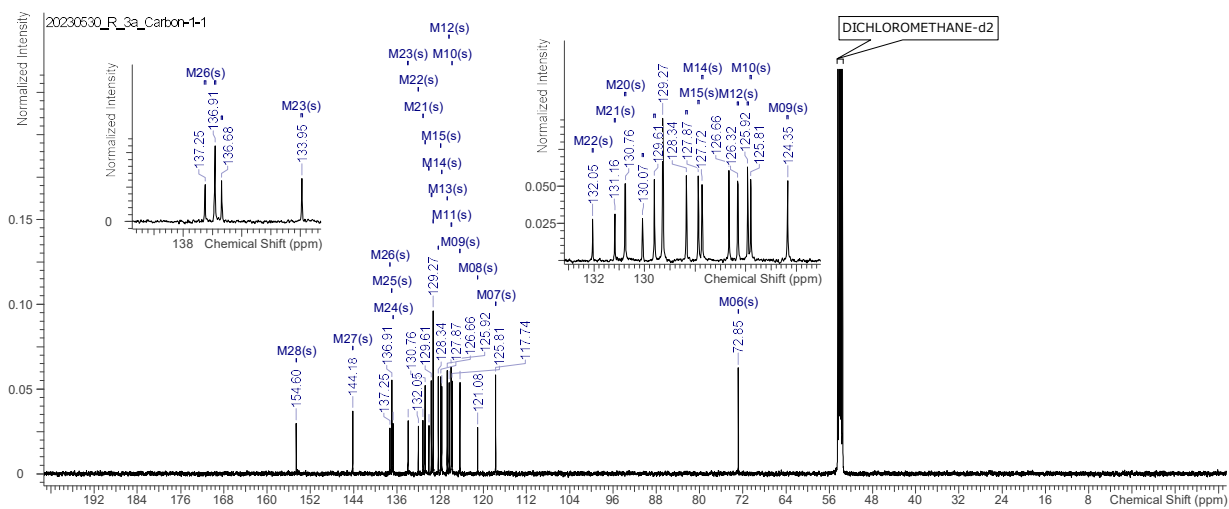

Fig. S26  $^{13}\text{C}$  NMR spectrum of (*R*)-**3a** (20 °C,  $\text{CD}_2\text{Cl}_2$ ).

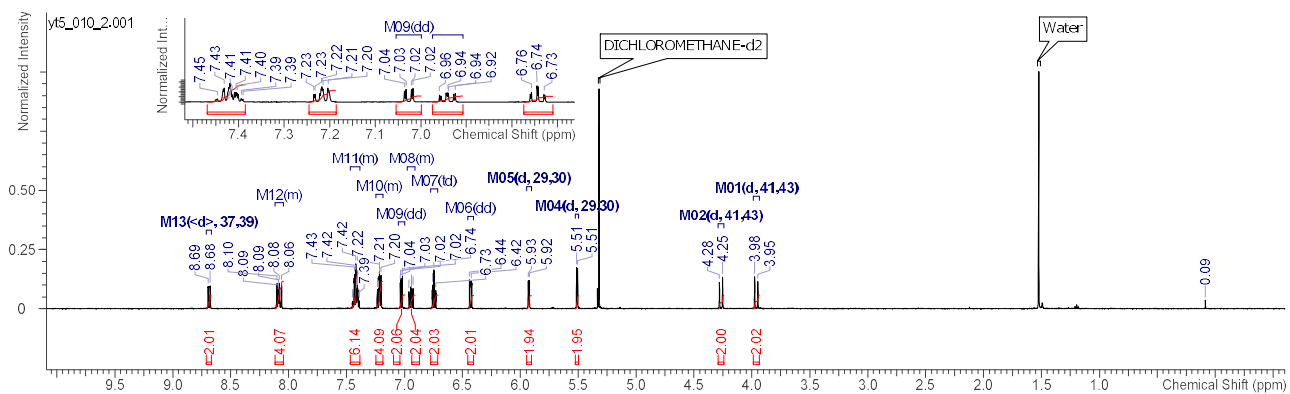

Fig. S27  $^1\text{H}$  NMR spectrum of **3b** (20 °C,  $\text{CD}_2\text{Cl}_2$ ).

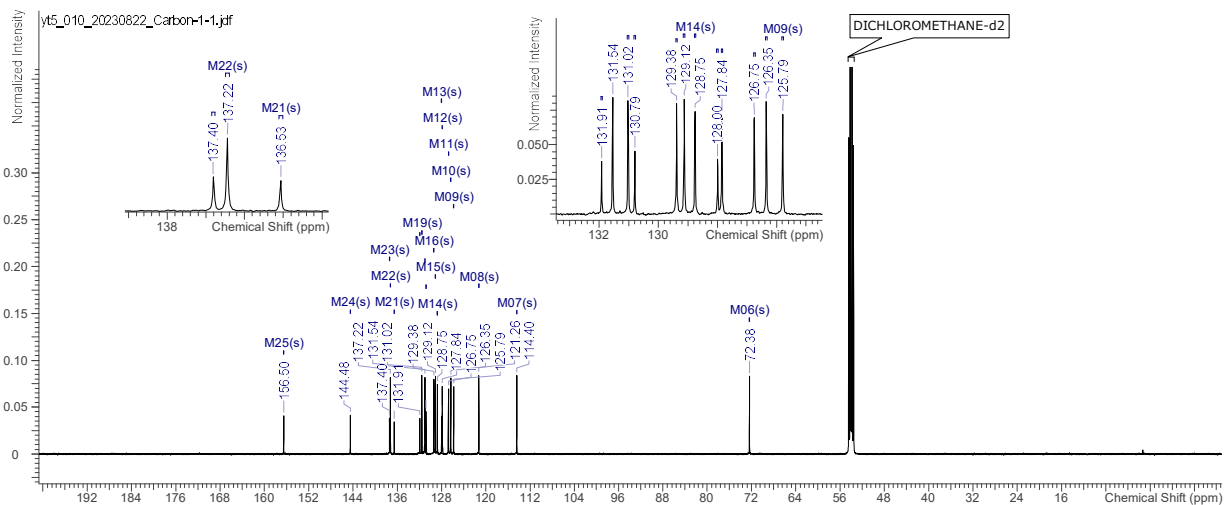

Fig. S28  $^{13}\text{C}$  NMR spectrum of **3b** (20 °C,  $\text{CD}_2\text{Cl}_2$ ).

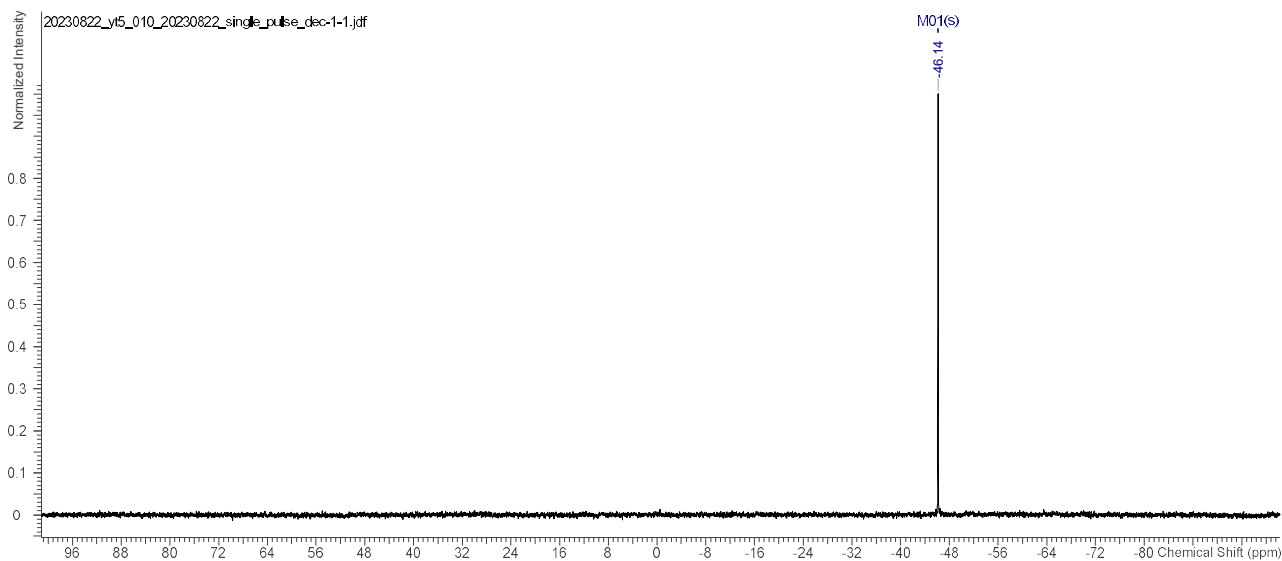

Fig. S29  $^{29}\text{Si}$  NMR spectrum of **3b** (20 °C,  $\text{CD}_2\text{Cl}_2$ ).

#### 4. Crystallography

A suitable crystal was mounted with mineral oil on a glass fiber and transferred to the goniometer of a Bruker D8 VENTURE or Rigaku XtaLAB PRO HPC CCD diffractometer with Cu K $\alpha$  ( $\alpha = 1.5418$  Å, (S)-**3a-E**, (S)-**3a-H**, **3b**) or Mo K $\alpha$  radiation ( $\alpha = 0.71073$  Å, *rac*-**3a**). The structures were solved by direct methods using SHELXT or Olex2, and refined using Olex2. The non-hydrogen atoms were refined anisotropically. Hydrogen atoms were placed on the carbon atoms according to the AFIX instructions.

**Table S1** Crystallographic data

| Crystal                                                     | (S)- <b>3a-E</b>                                               | (S)- <b>3a-H</b>                                                   | <i>rac</i> - <b>3a</b>                                         | <b>3b</b>                                                      |
|-------------------------------------------------------------|----------------------------------------------------------------|--------------------------------------------------------------------|----------------------------------------------------------------|----------------------------------------------------------------|
| Chemical formula                                            | C <sub>48</sub> H <sub>36</sub> O <sub>2</sub> Si <sub>2</sub> | C <sub>48</sub> H <sub>35.787</sub> O <sub>2</sub> Si <sub>2</sub> | C <sub>48</sub> H <sub>36</sub> O <sub>2</sub> Si <sub>2</sub> | C <sub>40</sub> H <sub>32</sub> O <sub>2</sub> Si <sub>2</sub> |
| Formula weight                                              | 700.90                                                         | 700.78                                                             | 700.99                                                         | 600.87                                                         |
| Color                                                       | colorless                                                      | yellow                                                             | yellow                                                         | green                                                          |
| Shape                                                       | block                                                          | block                                                              | block                                                          | block                                                          |
| Crystal system                                              | triclinic                                                      | monoclinic                                                         | monoclinic                                                     | triclinic                                                      |
| Space group                                                 | <i>P</i> 1                                                     | <i>P</i> 1 2 <sub>1</sub> 1                                        | <i>P</i> 1 2 <sub>1</sub> / <i>n</i> 1                         | <i>P</i> $\bar{1}$                                             |
| <i>a</i> (Å)                                                | 11.5209(5)                                                     | 11.19827(2)                                                        | 11.2799(5)                                                     | 10.45340(10)                                                   |
| <i>b</i> (Å)                                                | 11.6461(5)                                                     | 27.60749(6)                                                        | 17.2391(8)                                                     | 12.10100(10)                                                   |
| <i>c</i> (Å)                                                | 28.3488(12)                                                    | 18.08478(4)                                                        | 18.9684(7)                                                     | 13.64410(10)                                                   |
| $\beta$ (°)                                                 | 91.906(2)                                                      | 90.5504(2)                                                         | 102.339(1)                                                     | 104.5240(10)                                                   |
| Volume                                                      | 3723.5(3)                                                      | 5590.76(2)                                                         | 3603.3(3)                                                      | 1530.15(3)                                                     |
| <i>Z</i>                                                    | 4                                                              | 6                                                                  | 4                                                              | 2                                                              |
| <i>D</i> <sub>calc</sub> (g/cm <sup>3</sup> )               | 1.250                                                          | 1.249                                                              | 1.292                                                          | 1.304                                                          |
| <i>R</i> <sub>1</sub> ( <i>I</i> > 2 $\sigma$ ( <i>I</i> )) | 0.0609                                                         | 0.0358                                                             | 0.0336                                                         | 0.0386                                                         |
| <i>wR</i> <sub>2</sub> (All reflections)                    | 0.1751                                                         | 0.1014                                                             | 0.0855                                                         | 0.1042                                                         |
| Reflections ( <i>I</i> > 2 $\sigma$ ( <i>I</i> ))           | 25617                                                          | 21511                                                              | 6607                                                           | 5873                                                           |
| Temperature (K)                                             | 223                                                            | 223                                                                | 93                                                             | 223                                                            |
| CCDC number                                                 | 2264847                                                        | 1916744                                                            | 2264848                                                        | 1916745                                                        |

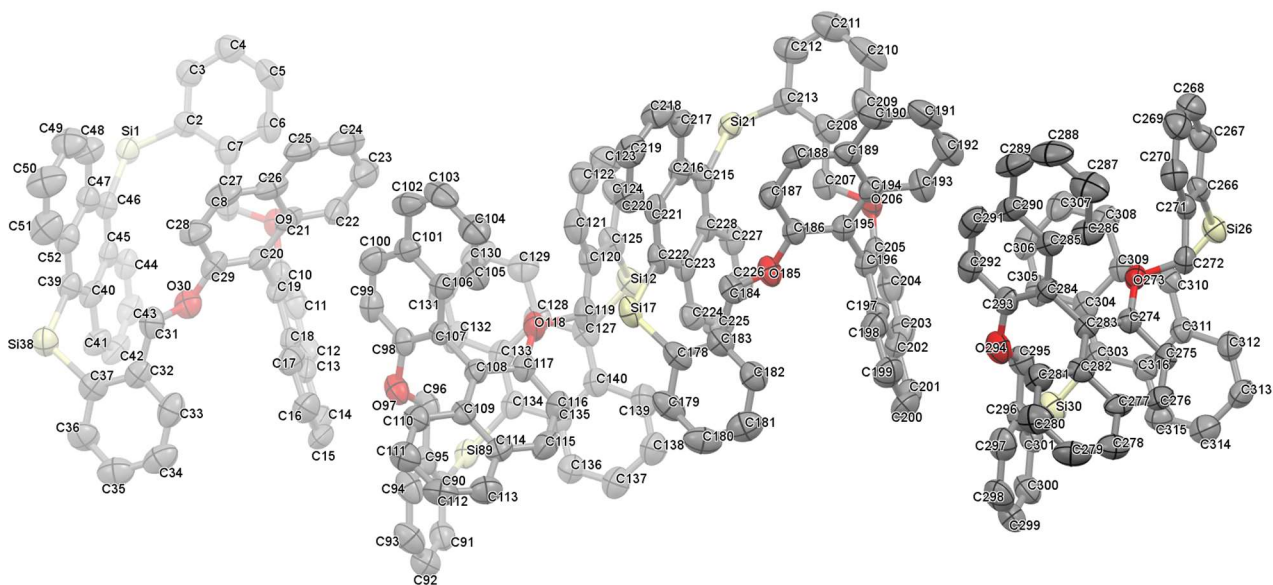

**Fig. S30** X-ray crystal structure of (*S*)-**3a-E**. Thermal ellipsoids were drawn at a 50% probability level. Hydrogen atoms were omitted for clarity.

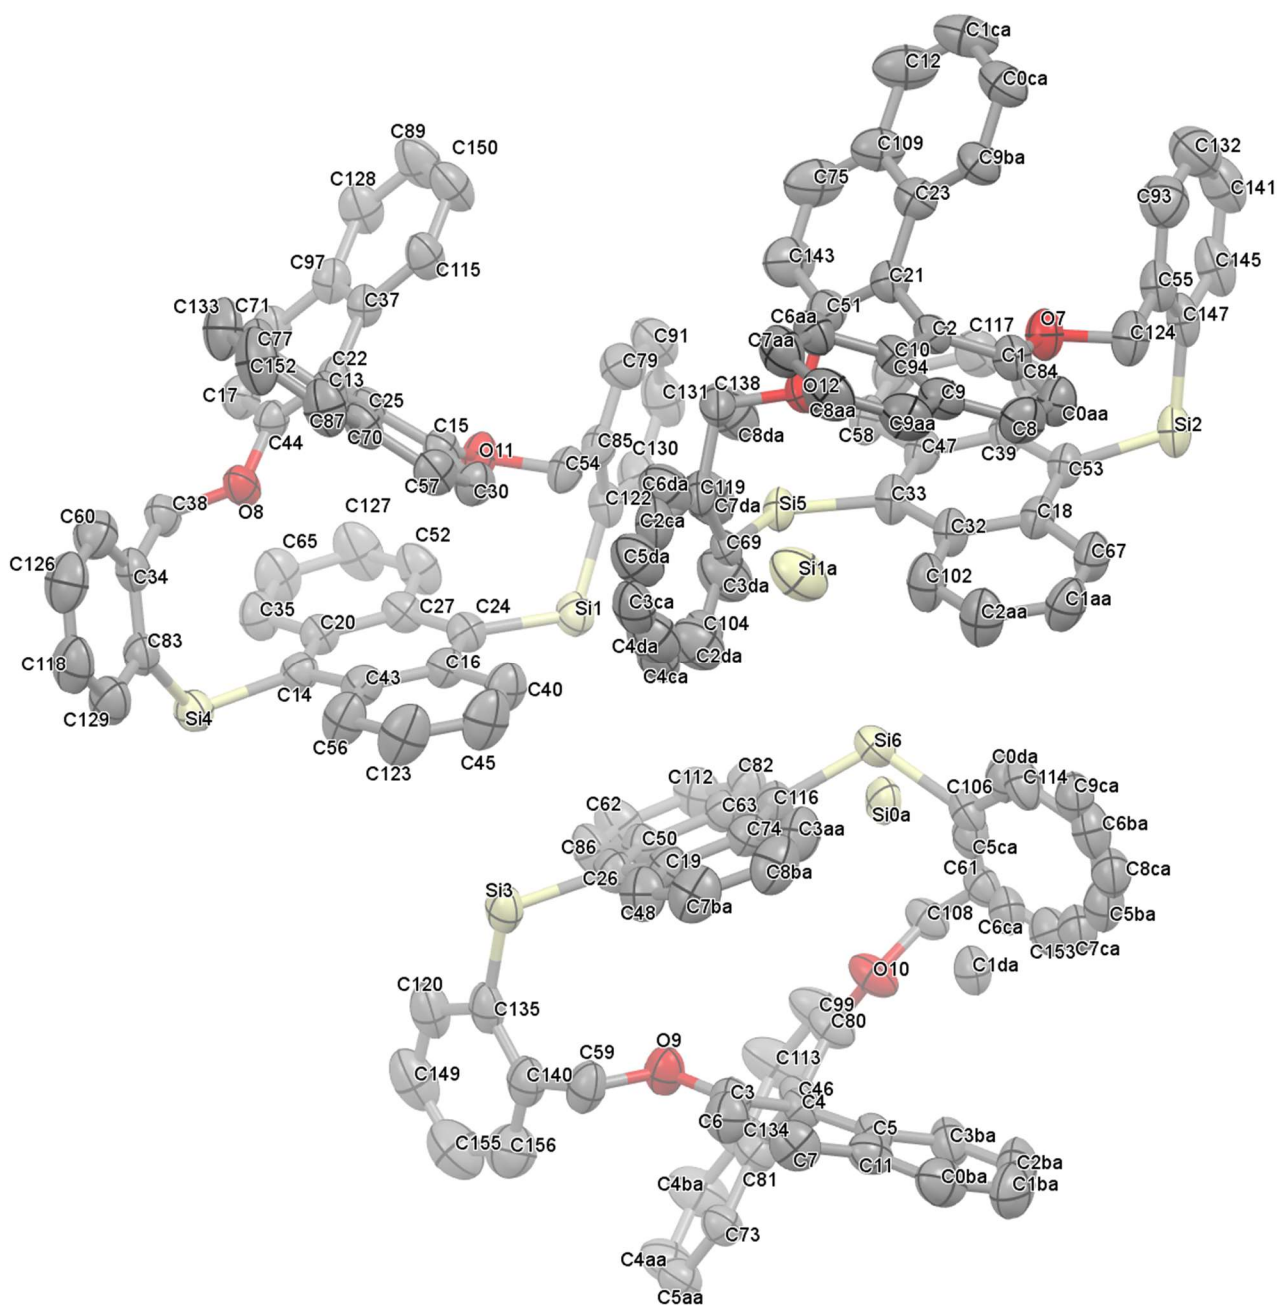

**Fig. S31** X-ray crystal structure of (*S*)-**3a**-H. Thermal ellipsoids were drawn at a 50% probability level. Hydrogen atoms were omitted for clarity.

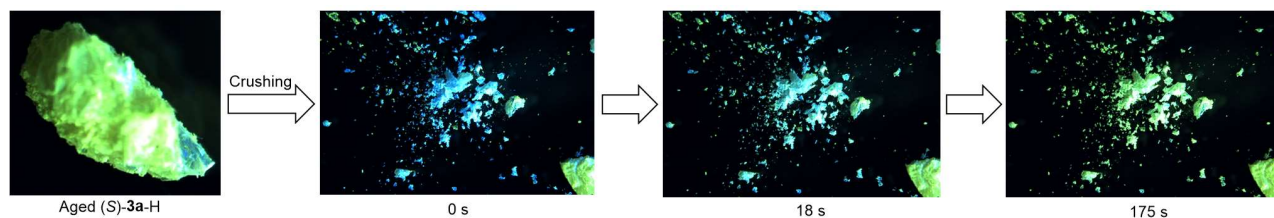

**Fig. S32** Photographs of (*S*)-**3a**-H. Aged (*S*)-**3a**-H exhibited green luminescence. Immediately after crushing, the inner portion exhibited blue luminescence. The color gradually changed to green within 3 min.



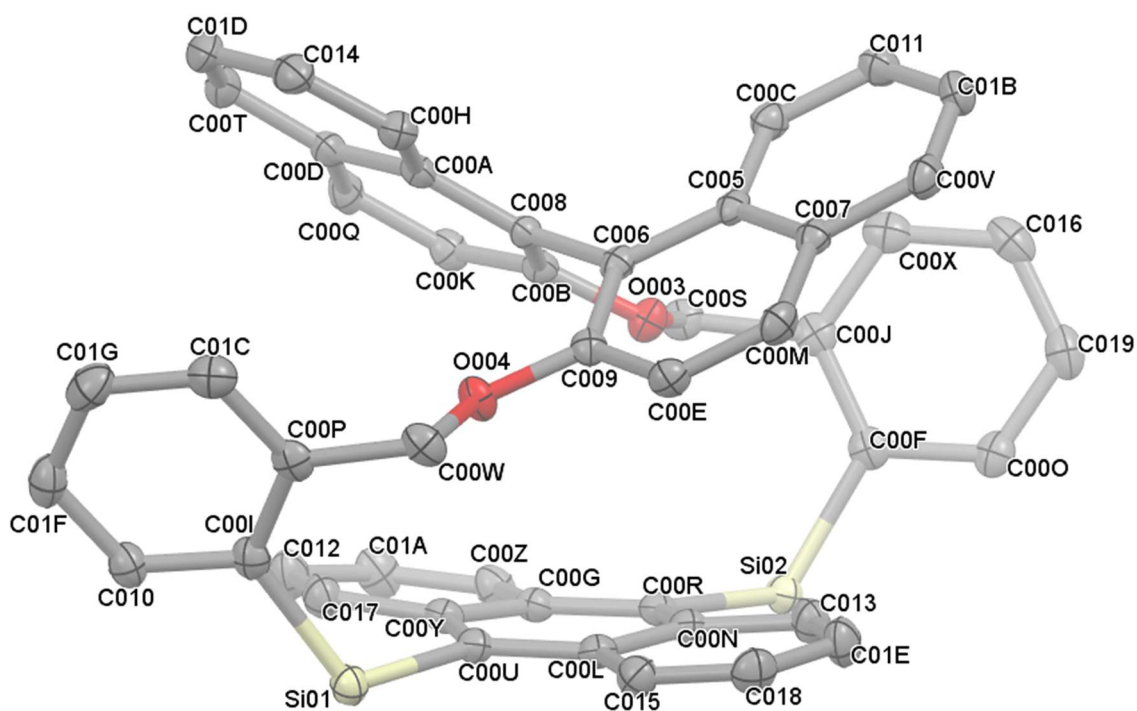

**Fig. S33** X-ray crystal structure of *rac*-3a. Thermal ellipsoids were drawn at a 50% probability level. Hydrogen atoms were omitted for clarity.

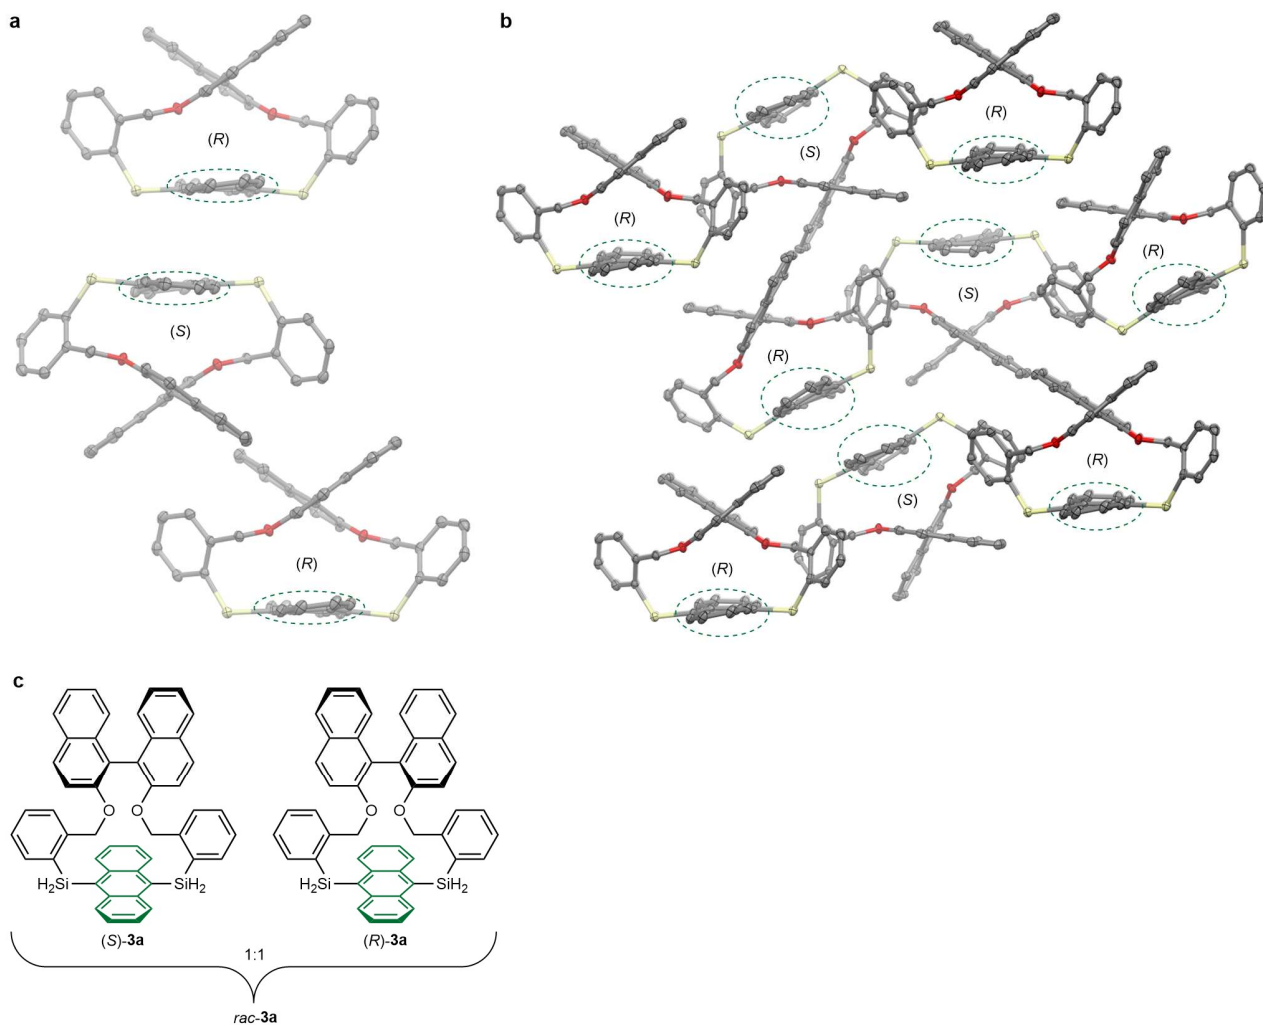

**Fig. S34** Crystal Packing of *rac*-3a. **a** Head-to-head and tail-to-tail structures of *rac*-3a. **b** Packing structure of *rac*-3a. **c** Chemical structure. Thermal ellipsoids were drawn at a 50% probability level. Hydrogen atoms were omitted for clarity. The anthracene rings are indicated by broken green lines.

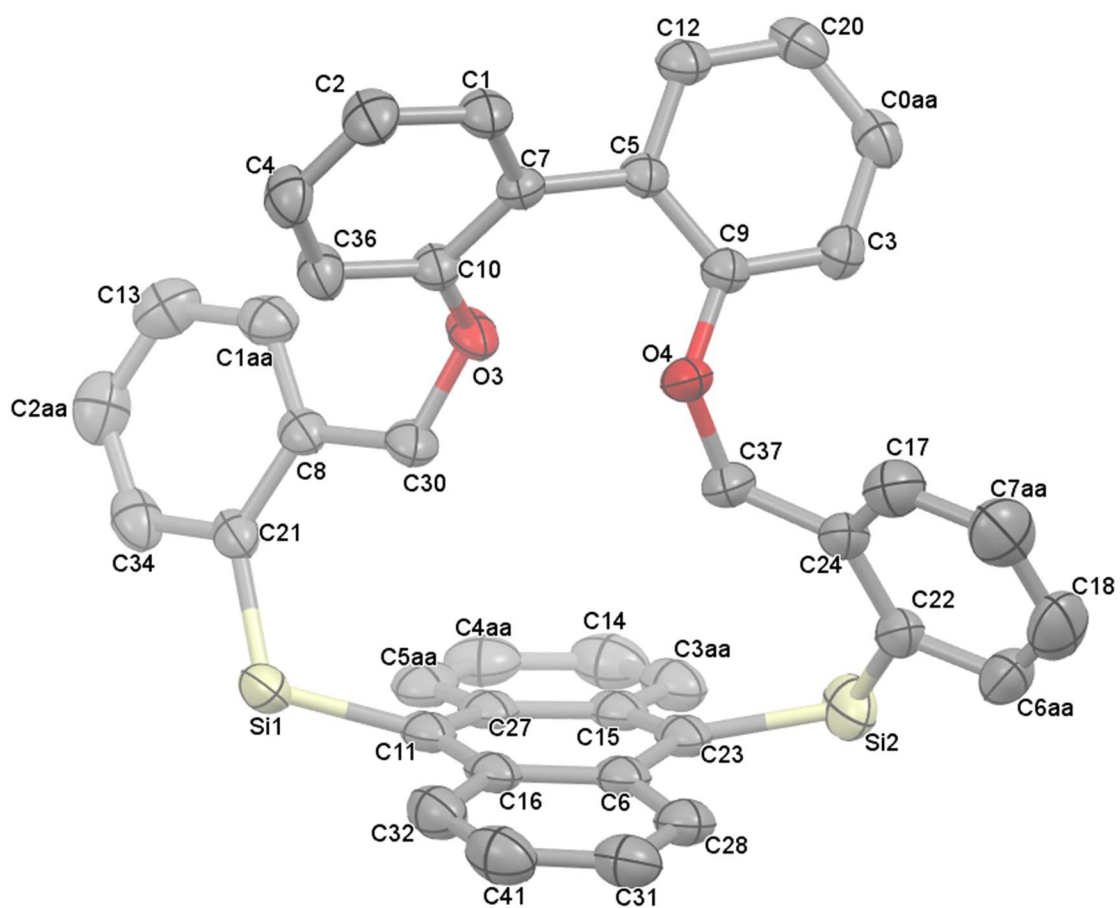

**Fig. S35** X-ray crystal structure of *rac*-3a. Thermal ellipsoids were drawn at a 50% probability level. Hydrogen atoms were omitted for clarity.

## 5. Density functional theory (DFT) calculation

### 5.1. Dimerization energy

DFT calculations were performed using ORCA 5.0<sup>31</sup>. The initial dimeric structures were extracted from the crystal structures, followed by optimization of hydrogens using the r<sup>2</sup>SCAN-3c<sup>30</sup> which includes D4 dispersion correction and also gCP correction to remove BSSE. The dimerization energies ( $\Delta E_{\text{total}}$ ) were evaluated using the sum of the interaction energy ( $\Delta E_{\text{int}}$ ) and strain energy ( $\Delta E_{\text{strain}}$ ). The term  $\Delta E_{\text{int}}$  denotes the energy difference between the dimers and monomers with a dimeric conformation.  $\Delta E_{\text{strain}}$  is the energy difference between the dimeric and monomeric conformers.

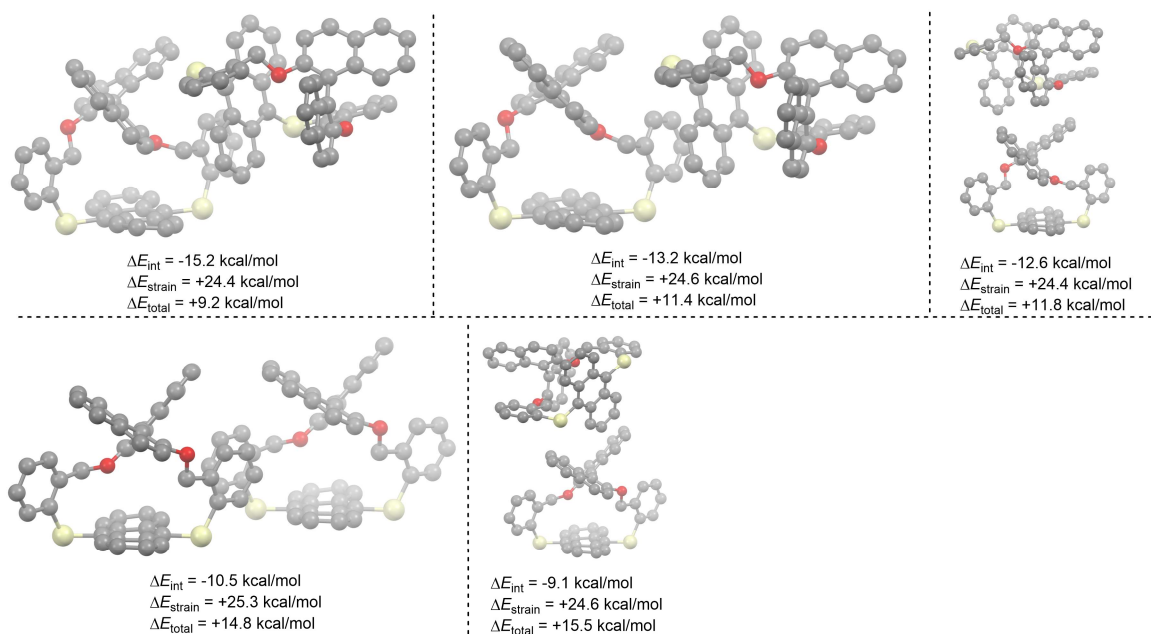

**Fig. S36** Dimeric structures of (S)-3a-E extracted from the crystal structures. The interaction ( $\Delta E_{\text{int}}$ ), strain ( $\Delta E_{\text{strain}}$ ), and dimerization ( $\Delta E_{\text{total}}$ ) energies are represented by the structures. Optimized hydrogen atoms by r<sup>2</sup>SCAN-3c were omitted for clarity.

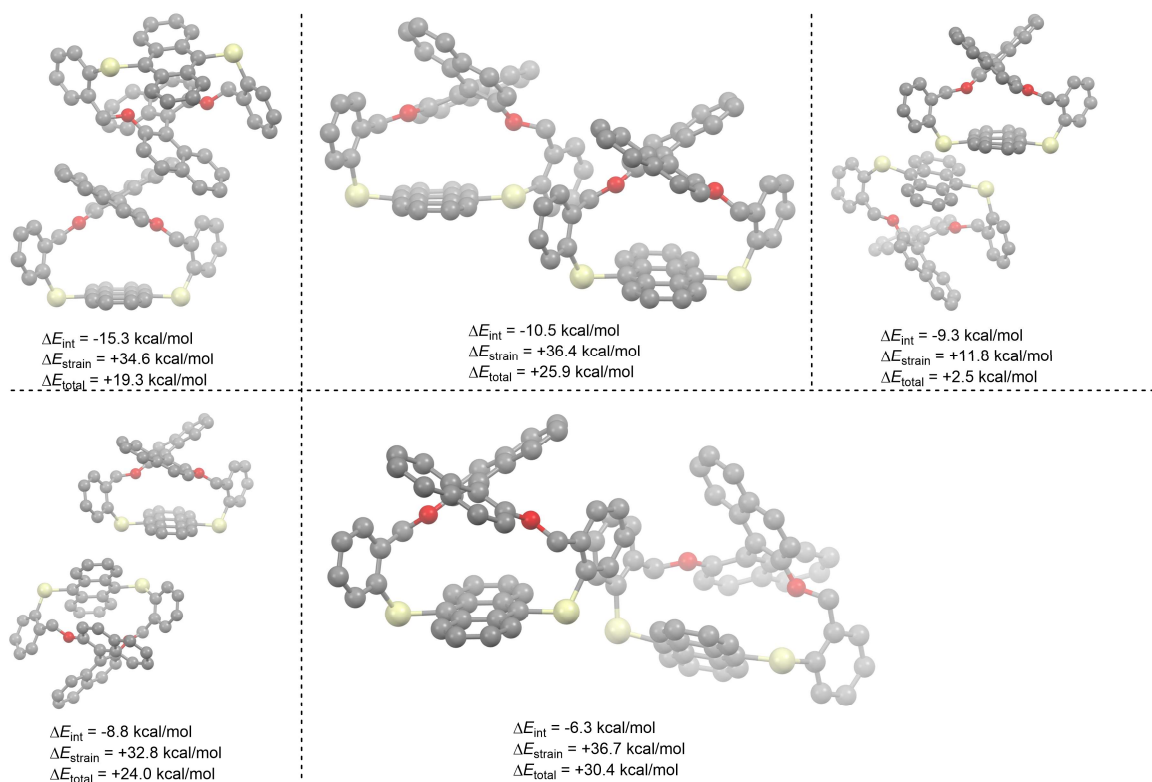

**Fig. S37** Dimeric structures of (S)-3a-H extracted from the crystal structures. The interaction ( $\Delta E_{\text{int}}$ ), strain ( $\Delta E_{\text{strain}}$ ), and dimerization ( $\Delta E_{\text{total}}$ ) energies are represented by the structures. Optimized hydrogen atoms by  $r^2\text{SCAN-3c}$  were omitted for clarity.

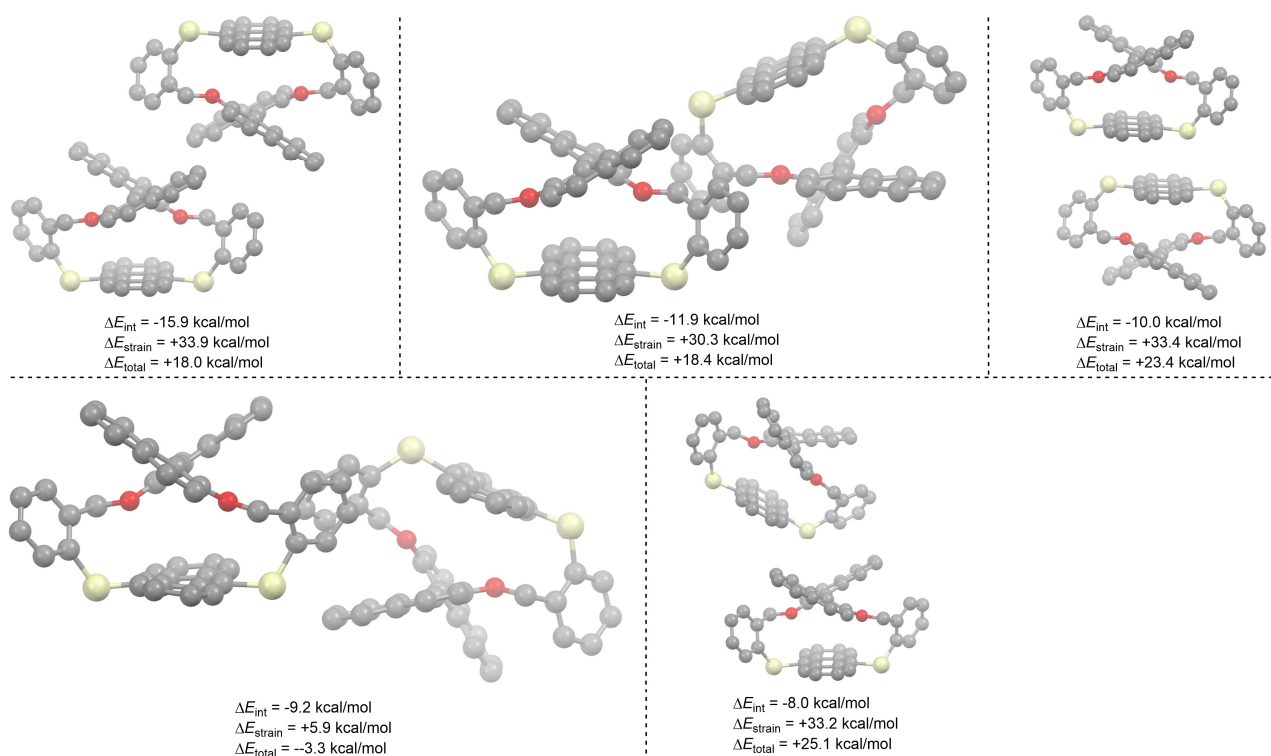

**Fig. S38** Dimeric structures of *rac*-**3a** extracted from the crystal structures. The interaction ( $\Delta E_{\text{int}}$ ), strain ( $\Delta E_{\text{strain}}$ ), and dimerization ( $\Delta E_{\text{total}}$ ) energies are represented by the structures. Optimized hydrogen atoms by  $r^2\text{SCAN-3c}$  were omitted for clarity.

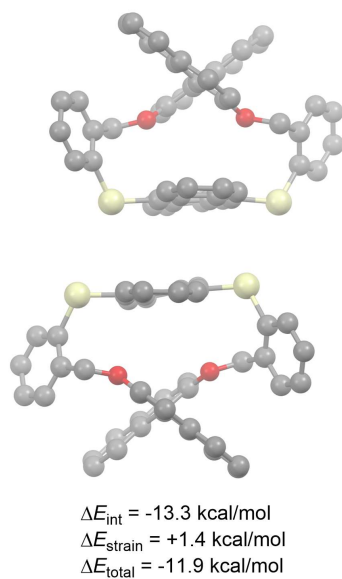

**Fig. S39** Virtual dimer of (*S*)-**3a** with  $\pi$ - $\pi$  interaction optimized by  $r^2\text{SCAN-3c}$ . The interaction ( $\Delta E_{\text{int}}$ ), strain ( $\Delta E_{\text{strain}}$ ), and dimerization ( $\Delta E_{\text{total}}$ ) energies are represented by the structures. Hydrogen atoms were omitted for clarity.

## 5.2. TD-DFT

Absorption and Emission energies were calculated at PBE0/def2-SVP//PBE0/def2-SVP level with Tamm–Dancoff approximation.

**Table S2.** Computed electronic absorption transition of 9,10-disilylanthracene using PBE0/def2-SVP//PBE0/def2-SVP.

| Excited state | Energy (nm) | $f^{[a]}$   | Composition                                                                                |
|---------------|-------------|-------------|--------------------------------------------------------------------------------------------|
| 1             | 365.4       | 0.172189272 | HOMO → LUMO (92%)                                                                          |
| 2             | 317.5       | 0.009073822 | HOMO–1 → LUMO (55%)<br>HOMO → LUMO+1 (44%)                                                 |
| 3             | 274.6       | 0.000996964 | HOMO–2 → LUMO (86%)<br>HOMO → LUMO+2 (12%)                                                 |
| 4             | 248.9       | 0.002217679 | HOMO–3 → LUMO (98%)                                                                        |
| 5             | 245.1       | 0.000821870 | HOMO → LUMO+2 (53%)<br>HOMO → LUMO+3 (25%)<br>HOMO–4 → LUMO (14%)                          |
| 6             | 237.4       | 0.000489571 | HOMO → LUMO+3 (43%)<br>HOMO → LUMO+2 (30%)<br>HOMO–4 → LUMO+2 (17%)                        |
| 7             | 223.2       | 1.353841366 | HOMO → LUMO+1 (34%)<br>HOMO–1 → LUMO (26%)<br>HOMO–2 → LUMO+1 (13%)<br>HOMO–5 → LUMO (12%) |
| 8             | 219.3       | 0.843003770 | HOMO–5 → LUMO (26%)<br>HOMO–2 → LUMO+1 (22%)<br>HOMO → LUMO+1 (18%)<br>HOMO–1 → LUMO (14%) |
| 9             | 216.9       | 0.126593276 | HOMO–4 → LUMO (65%)<br>HOMO → LUMO+3 (29%)                                                 |
| 10            | 206.5       | 0.026276795 | HOMO–5 → LUMO (44%)<br>HOMO–1 → LUMO+2 (35%)<br>HOMO–2 → LUMO+1 (14%)                      |

[a] Oscillator strength.

**Table S3.** Computed electronic absorption transition of a  $\pi$ -stacked dimer of 9,10-disilylanthracene using PBE0/def2-SVP//PBE0/def2-SVP.

| Excited state | Energy (nm) | $f^{[a]}$   | Composition                                                                                                                                  |
|---------------|-------------|-------------|----------------------------------------------------------------------------------------------------------------------------------------------|
| 1             | 433.9       | 0.000040249 | HOMO $\rightarrow$ LUMO (75%)<br>HOMO-1 $\rightarrow$ LUMO+1 (19%)                                                                           |
| 2             | 429.0       | 0.026206328 | HOMO $\rightarrow$ LUMO+1 (65%)<br>HOMO-1 $\rightarrow$ LUMO (29%)                                                                           |
| 3             | 378.9       | 0.000128060 | HOMO-1 $\rightarrow$ LUMO+1 (70%)<br>HOMO $\rightarrow$ LUMO (18%)                                                                           |
| 4             | 362.2       | 0.240325624 | HOMO-1 $\rightarrow$ LUMO (58%)<br>HOMO $\rightarrow$ LUMO+1 (26%)                                                                           |
| 5             | 321.4       | 0.000033056 | HOMO-2 $\rightarrow$ LUMO (43%)<br>HOMO $\rightarrow$ LUMO+2 (31%)<br>HOMO-3 $\rightarrow$ LUMO+1 (13%)                                      |
| 6             | 319.4       | 0.009567309 | HOMO-2 $\rightarrow$ LUMO+1 (39%)<br>HOMO $\rightarrow$ LUMO+3 (28%)<br>HOMO-1 $\rightarrow$ LUMO+2 (16%)<br>HOMO-3 $\rightarrow$ LUMO (13%) |
| 7             | 298.5       | 0.000361759 | HOMO-3 $\rightarrow$ LUMO+2 (52%)<br>HOMO-2 $\rightarrow$ LUMO (36%)                                                                         |
| 8             | 296.5       | 0.028536375 | HOMO-3 $\rightarrow$ LUMO (54%)<br>HOMO-2 $\rightarrow$ LUMO+1 (33%)                                                                         |
| 9             | 284.9       | 0.014493768 | HOMO-4 $\rightarrow$ LUMO (88%)                                                                                                              |
| 10            | 284.2       | 0.000033175 | HOMO-4 $\rightarrow$ LUMO+1 (83%)                                                                                                            |

[a] Oscillator strength.



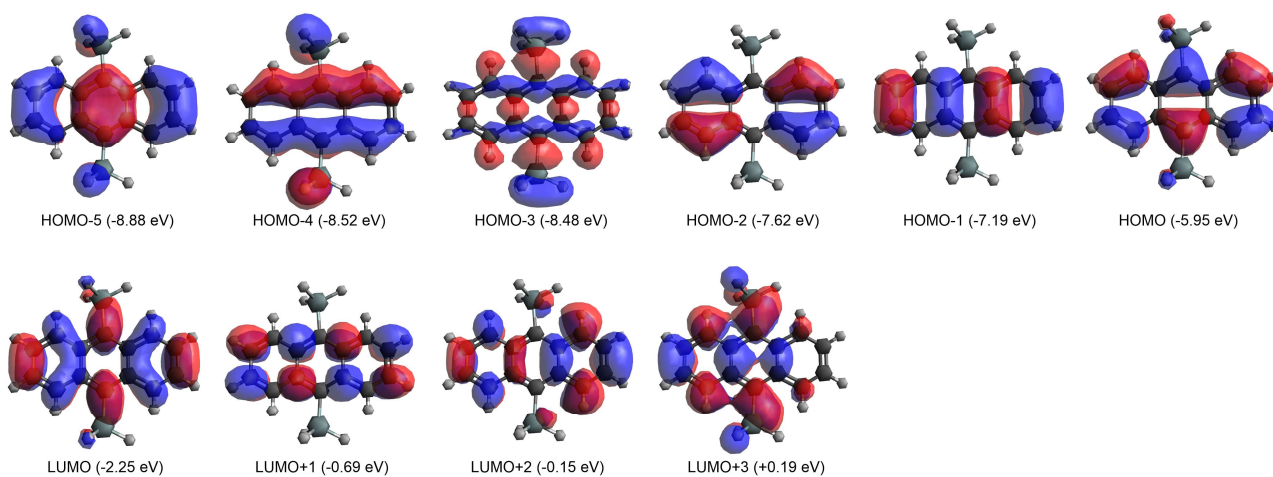

**Fig. S40** Frontier orbitals of 9,10-disilylanthracene (PBE0/def2-SVP//PBE0/def2-SVP).

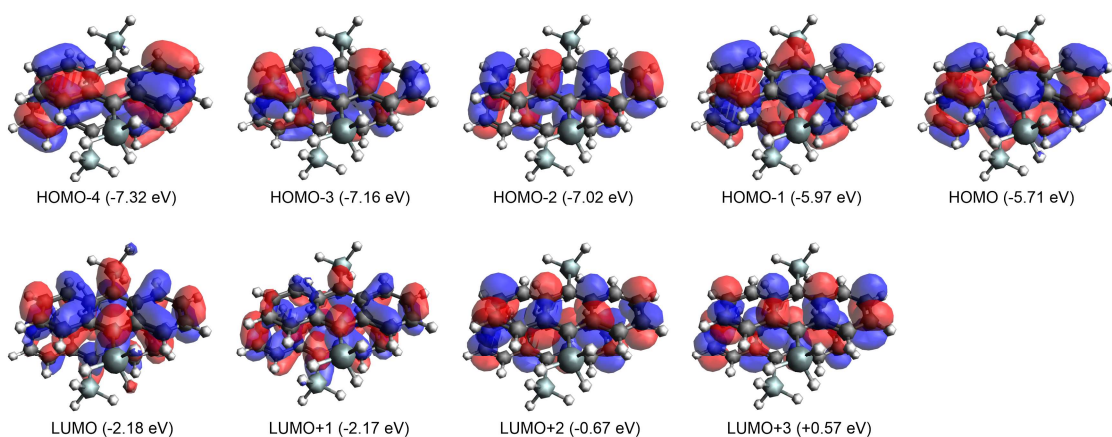

**Fig. S41** Frontier orbitals of a  $\pi$ -stacked dimer of 9,10-disilylanthracene (PBE0/def2-SVP//PBE0/def2-SVP).

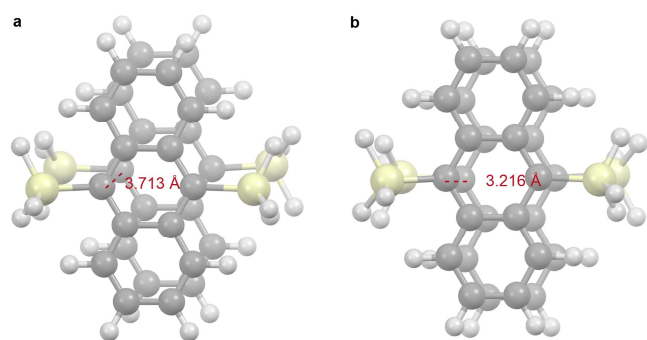

**Fig. S42** Optimized structures of a  $\pi$ -stacked dimer of 9,10-disilylanthracene (PBE0/def2-SVP//PBE0/def2-SVP). **a**,  $S_0$ . **b**,  $S_1$ .

## 6. Thermal analysis

Thermogravimetric analysis (TGA) and differential thermal analysis (DTA) were performed using a Shimadzu DTG-60 analyzer under helium flow. Each sample weighed ~5 mg. The samples were placed in aluminum pans. The heating and cooling rates were  $10 \text{ K min}^{-1}$  and  $2 \text{ K min}^{-1}$ , respectively.

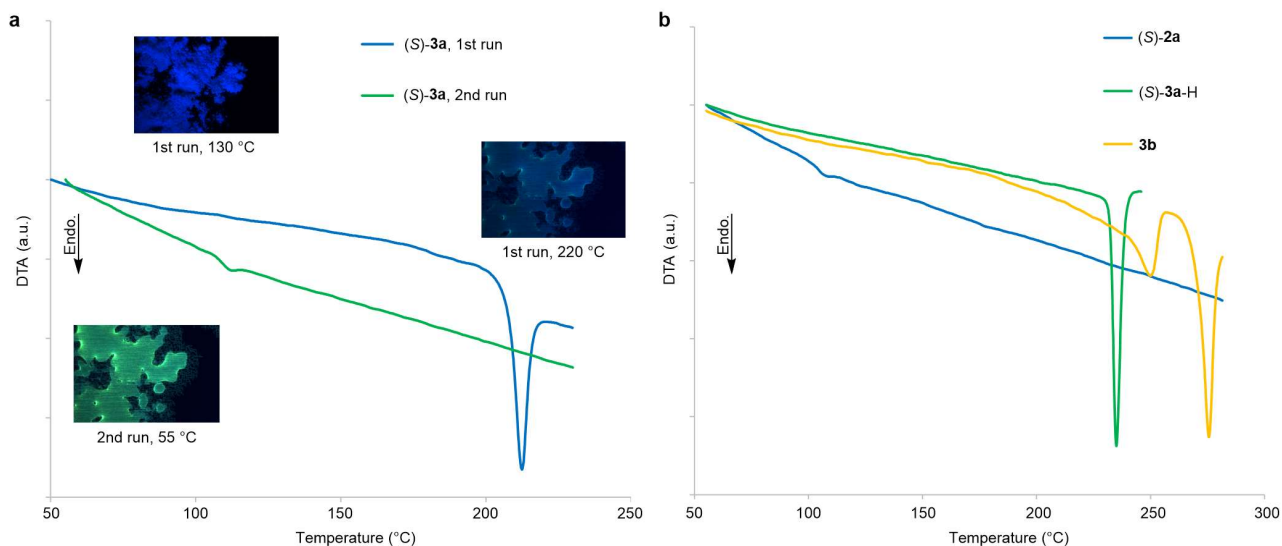

**Fig. S43** DTA results at a scanning rate of  $+10 \text{ °C min}^{-1}$ . **a**, The powder of (S)-3a melted at 212 °C in the first run (blue). In the second run (green), the glass of (S)-3a showed a baseline shift around 107 °C. **b**, The powder of (S)-2a (blue) showed a baseline shift around 104 °C, which indicated the powder was glass. The melting point of (S)-3a-H (green) is 232 °C. The crystals of 3b (yellow) decomposed and melted above 240 °C so that the crystal structure was maintained in the photoluminescence measurement at 220 °C.

## 7. UV-vis absorption spectra

UV-vis absorption spectra were obtained using a SHIMADZU UV-1800 spectrometer.

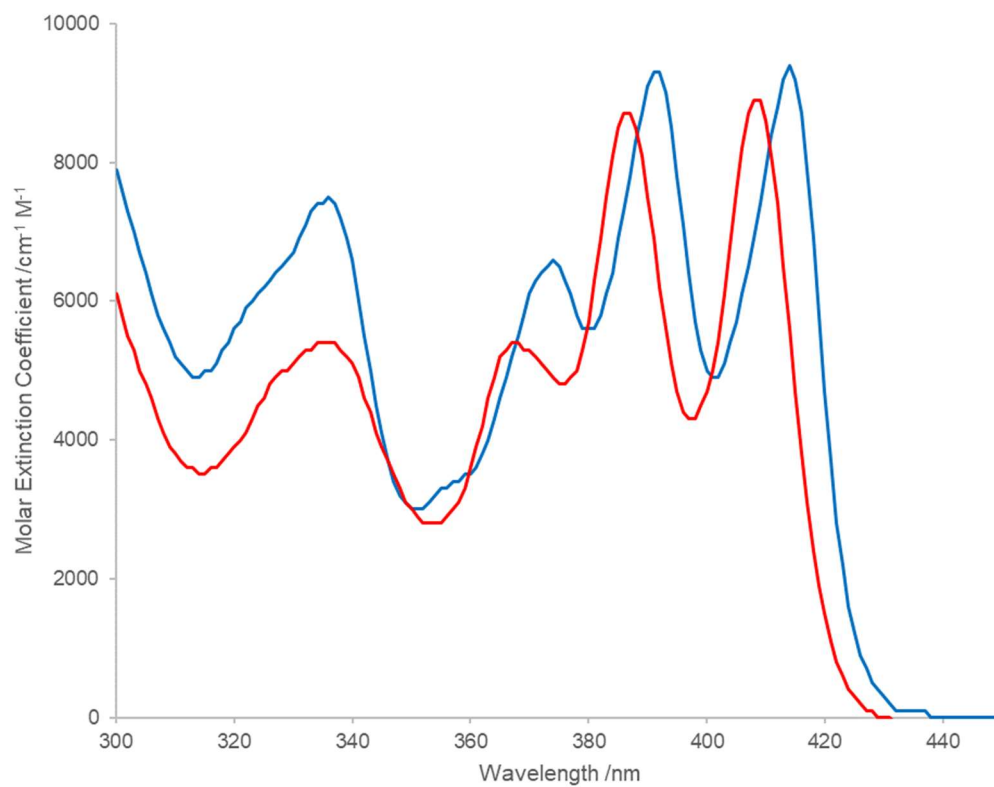

**Fig. S44** UV-vis spectra of (S)-2a (blue) and (S)-3a (red) in CHCl<sub>3</sub> (1.0 × 10<sup>-5</sup> M).

## 8. Photoluminescence Data

Photoluminescence spectra of the solutions were obtained using a SHIMADZU RF-5300PC spectrometer. Photoluminescence spectra of the glasses, crystals and films were obtained using an Ocean Optics USB 4000 fiber spectrometer. The excitation wavelength was 365 nm. The sample temperature was controlled using a MSA FACTORY PH132 hot plate. A portable fan and ice bag was used for rapid cooling to 110-170 °C and 20 °C, respectively. Luminescence spectra and quantum yields of solution were also obtained on the Otsuka Electronics QE-2000 system. Luminescence quantum yields of the glassy and crystalline samples were obtained using a JASCO FP-8500 spectrometer.

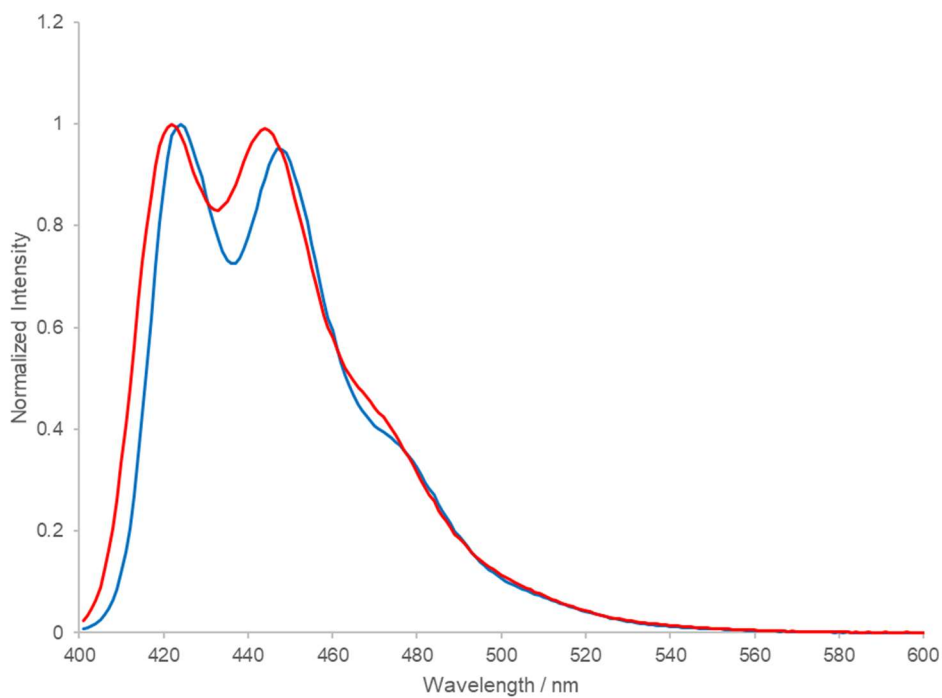

**Fig. S45** Photoluminescence spectra of (S)-**2a** (blue,  $\lambda_{\text{ex}} = 391$  nm) and (S)-**3a** (red,  $\lambda_{\text{ex}} = 387$  nm) in CHCl<sub>3</sub> ( $1.0 \times 10^{-5}$  M).

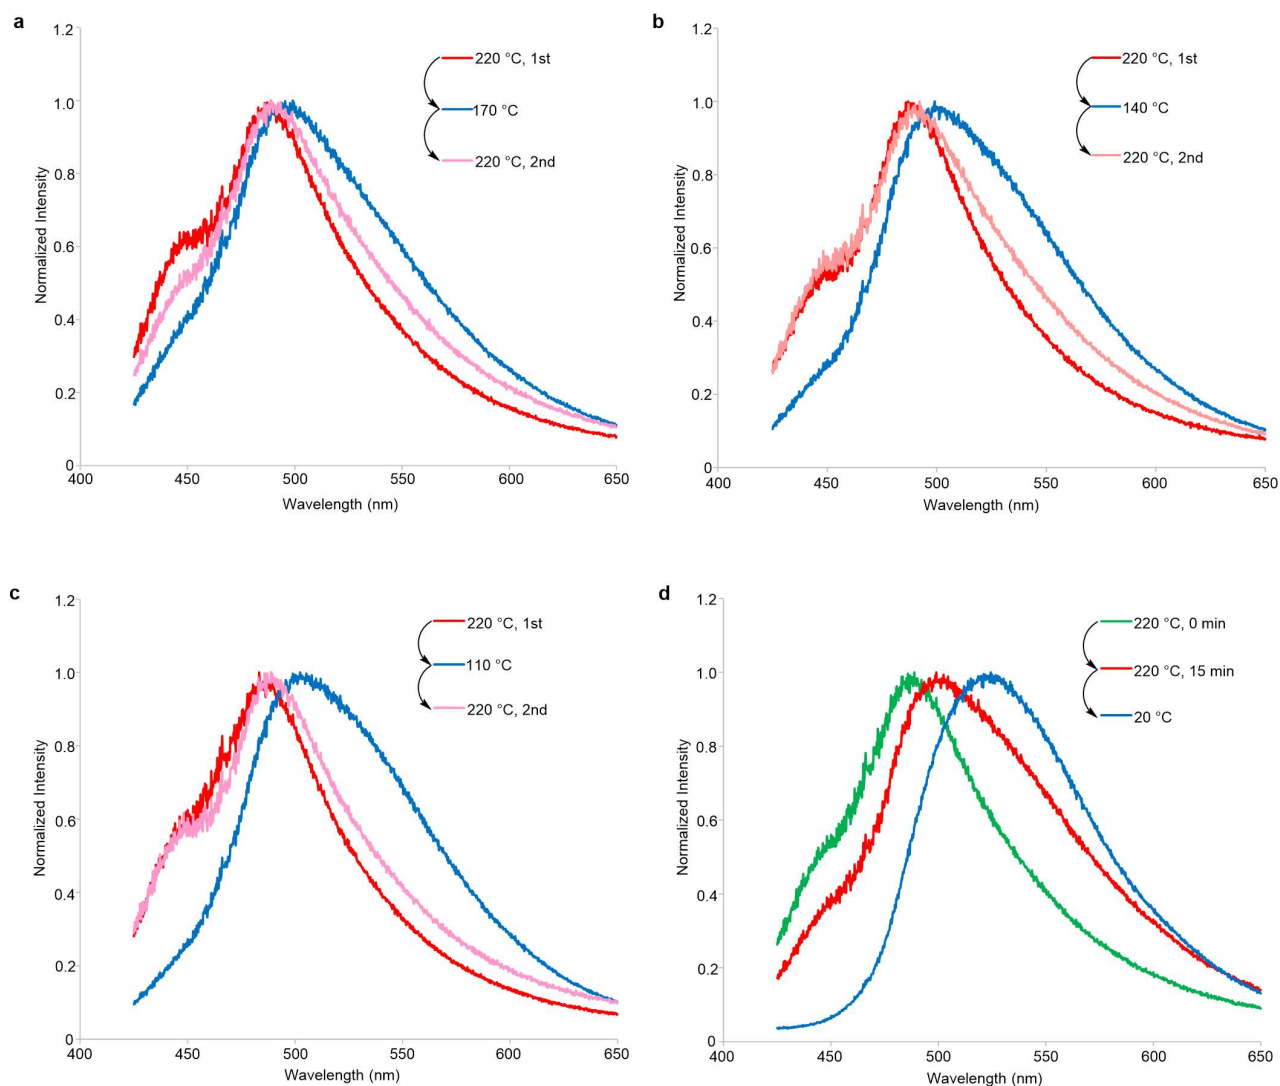

**Fig. S46** Photoluminescence spectra of (S)-3a. **a**, Cooling the melt of (S)-3a to 170 °C, followed by heating to 220 °C. **b**, Cooling the melt of (S)-3a to 140 °C, followed by heating to 220 °C. **c**, Cooling the melt of (S)-3a to 110 °C, followed by heating to 220 °C. **d**, maintaining the melt of (S)-3a at 220 °C for 15 min, followed by cooling to 20 °C.

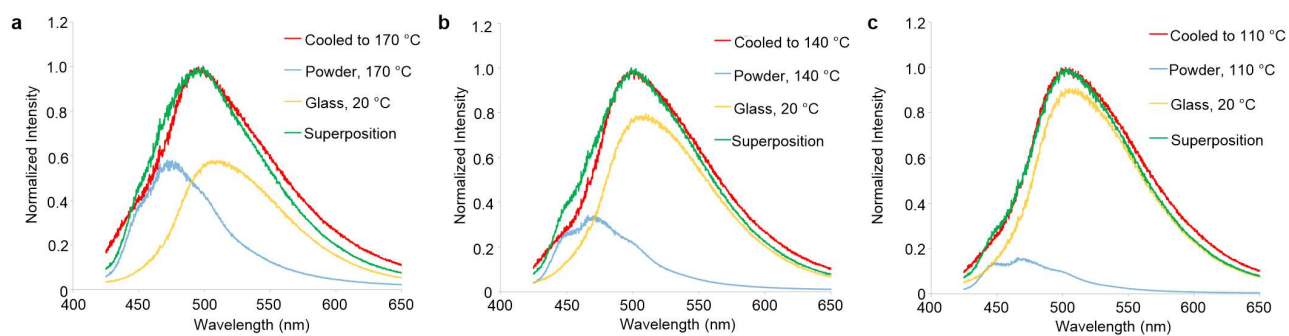

**Fig. S47** Fitted photoluminescence spectra of (S)-3a by superposition of those of the powder and glass samples. **a**, Fitting the sample cooled to 170 °C. **b**, Fitting of the sample cooled to 140 °C. **c**, Fitting of the sample cooled to 110 °C.

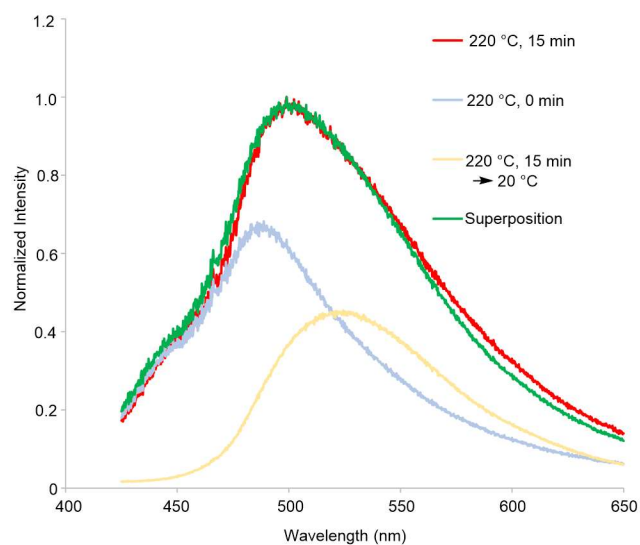

**Fig. S48** Fitted photoluminescence spectrum of (S)-3a by superposition of those immediately after melting and after aging followed by cooling. The superposition fitted well with the spectrum of the sample aged at 220 °C for 15 min, indicating that the dimers with  $\pi$ - $\pi$  interactions were tightly bound during the aging process.

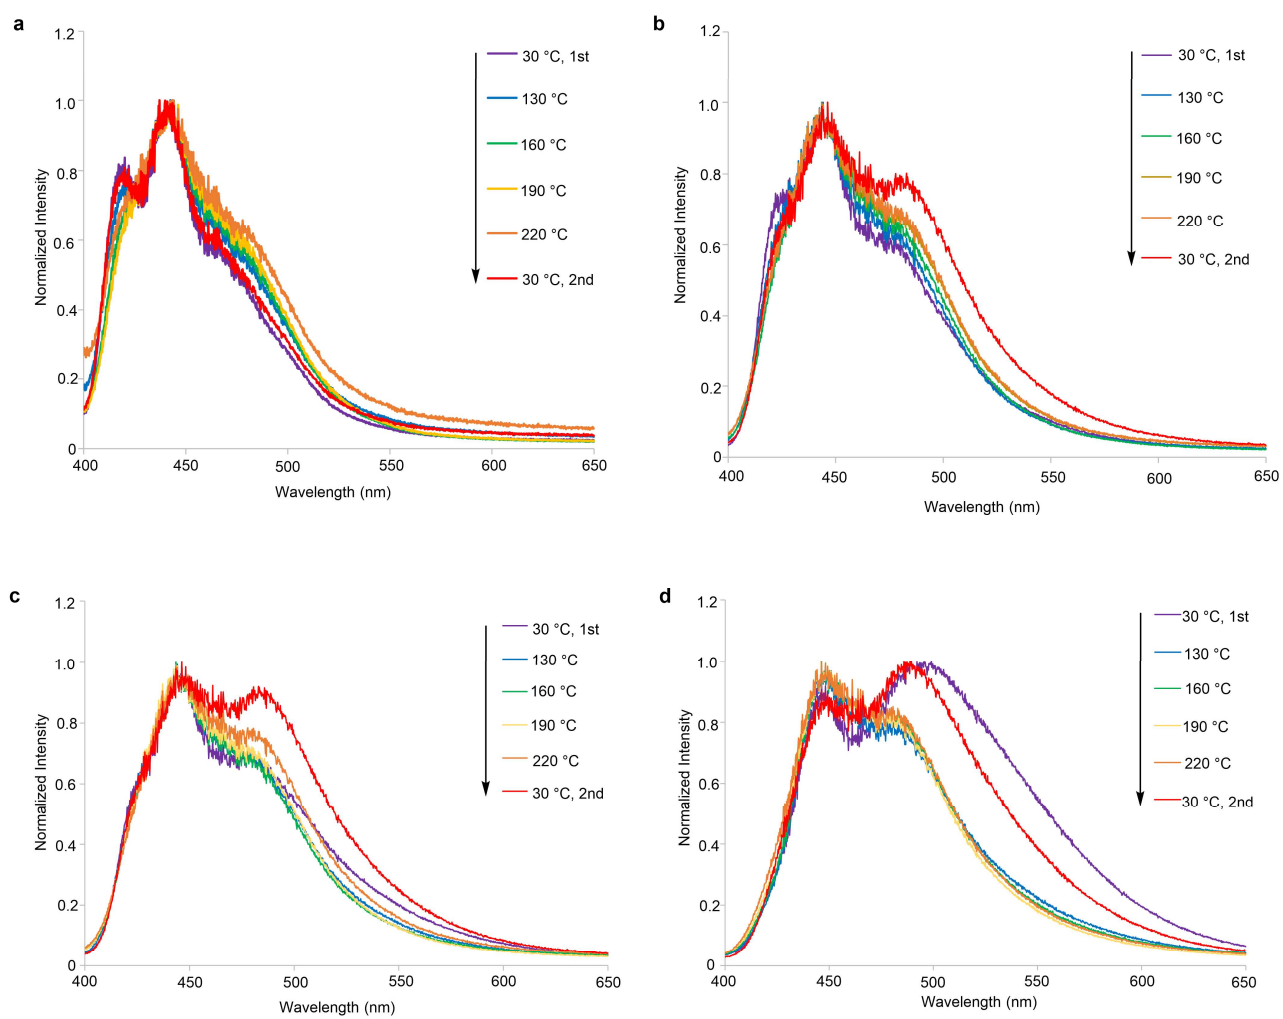

**Fig. S49** Photoluminescence spectra of (S)-3a in ZEONEX at various temperatures. **a**, 2 wt%. **b**, 5 wt%. **c**, 10 wt%. **d**, 20 wt%.

**Table S4** Photoluminescence quantum yield

| Compound      | Condition                         | $\Phi_{\text{PL}}$ |
|---------------|-----------------------------------|--------------------|
| <b>(S)-2a</b> | in $\text{CHCl}_3$ ( $10^{-5}$ M) | 0.99               |
|               | powder                            | 0.38               |
| <b>(S)-3a</b> | in $\text{CHCl}_3$ ( $10^{-5}$ M) | 0.78               |
|               | <b>(S)-3a -E</b>                  | 0.44               |
|               | <b>(S)-3a-H</b>                   | 0.34               |
|               | glass                             | 0.57               |
| <b>3b</b>     | in $\text{CHCl}_3$ ( $10^{-5}$ M) | 0.85               |
|               | crystal                           | 0.76               |





---

The following ALERTS were generated. Each ALERT has the format  
**test-name\_ALERT\_alert-type\_alert-level.**  
Click on the hyperlinks for more details of the test.

---

● **Alert level C**

|                   |                                                  |         |              |
|-------------------|--------------------------------------------------|---------|--------------|
| PLAT089_ALERT_3_C | Poor Data / Parameter Ratio (Zmax < 18) .....    | 6.97    | Note         |
| PLAT230_ALERT_2_C | Hirshfeld Test Diff for C14 --C15 .              | 6.0     | s.u.         |
| PLAT230_ALERT_2_C | Hirshfeld Test Diff for C24 --C25 .              | 6.2     | s.u.         |
| PLAT230_ALERT_2_C | Hirshfeld Test Diff for Si21 --C213 .            | 5.5     | s.u.         |
| PLAT230_ALERT_2_C | Hirshfeld Test Diff for C210 --C211 .            | 5.7     | s.u.         |
| PLAT340_ALERT_3_C | Low Bond Precision on C-C Bonds .....            | 0.00668 | Ang.         |
| PLAT410_ALERT_2_C | Short Intra H...H Contact H344 ..H345 .          | 1.99    | Ang.         |
|                   | x, y, z =                                        | 1_555   | Check        |
| PLAT420_ALERT_2_C | D-H Bond Without Acceptor Si1 --H53 .            |         | Please Check |
| PLAT420_ALERT_2_C | D-H Bond Without Acceptor Si1 --H54 .            |         | Please Check |
| PLAT420_ALERT_2_C | D-H Bond Without Acceptor Si38 --H79 .           |         | Please Check |
| PLAT420_ALERT_2_C | D-H Bond Without Acceptor Si38 --H80 .           |         | Please Check |
| PLAT420_ALERT_2_C | D-H Bond Without Acceptor Si89 --H141 .          |         | Please Check |
| PLAT420_ALERT_2_C | D-H Bond Without Acceptor Si89 --H142 .          |         | Please Check |
| PLAT420_ALERT_2_C | D-H Bond Without Acceptor Si12 --H167 .          |         | Please Check |
| PLAT420_ALERT_2_C | D-H Bond Without Acceptor Si12 --H168 .          |         | Please Check |
| PLAT420_ALERT_2_C | D-H Bond Without Acceptor Si21 --H229 .          |         | Please Check |
| PLAT420_ALERT_2_C | D-H Bond Without Acceptor Si21 --H230 .          |         | Please Check |
| PLAT420_ALERT_2_C | D-H Bond Without Acceptor Si17 --H255 .          |         | Please Check |
| PLAT420_ALERT_2_C | D-H Bond Without Acceptor Si17 --H256 .          |         | Please Check |
| PLAT420_ALERT_2_C | D-H Bond Without Acceptor Si26 --H317 .          |         | Please Check |
| PLAT420_ALERT_2_C | D-H Bond Without Acceptor Si26 --H318 .          |         | Please Check |
| PLAT420_ALERT_2_C | D-H Bond Without Acceptor Si30 --H343 .          |         | Please Check |
| PLAT420_ALERT_2_C | D-H Bond Without Acceptor Si30 --H344 .          |         | Please Check |
| PLAT767_ALERT_4_C | INS Embedded LIST 6 Instruction Should be LIST 4 |         | Please Check |
| PLAT790_ALERT_4_C | Centre of Gravity not Within Unit Cell: Resd. #  | 1       | Note         |
|                   | C48 H36 O2 Si2                                   |         |              |
| PLAT911_ALERT_3_C | Missing FCF Refl Between Thmin & STh/L= 0.600    | 225     | Report       |
| PLAT913_ALERT_3_C | Missing # of Very Strong Reflections in FCF .... | 14      | Note         |
| PLAT918_ALERT_3_C | Reflection(s) with I(obs) much Smaller I(calc) . | 64      | Check        |
| PLAT939_ALERT_3_C | Large Value of Not (SHELXL) Weight Optimized S . | 40.61   | Check        |
| PLAT987_ALERT_1_C | The Flack x is >> 0 - Do a BASF/TWIN Refinement  |         | Please Check |

---

● **Alert level G**

|                   |                                                  |        |              |
|-------------------|--------------------------------------------------|--------|--------------|
| PLAT002_ALERT_2_G | Number of Distance or Angle Restraints on AtSite | 26     | Note         |
| PLAT003_ALERT_2_G | Number of Uiso or Uij Restrained non-H Atoms ... | 2      | Report       |
| PLAT033_ALERT_4_G | Flack x Value Deviates > 3.0 * sigma from Zero . | 0.252  | Note         |
| PLAT068_ALERT_1_G | Reported F000 Differs from Calcd (or Missing)... |        | Please Check |
| PLAT154_ALERT_1_G | The s.u.'s on the Cell Angles are Equal ..(Note) | 0.002  | Degree       |
| PLAT172_ALERT_4_G | The CIF-Embedded .res File Contains DFIX Records | 1      | Report       |
| PLAT173_ALERT_4_G | The CIF-Embedded .res File Contains DANG Records | 10     | Report       |
| PLAT178_ALERT_4_G | The CIF-Embedded .res File Contains SIMU Records | 1      | Report       |
| PLAT186_ALERT_4_G | The CIF-Embedded .res File Contains ISOR Records | 1      | Report       |
| PLAT188_ALERT_3_G | A Non-default SIMU Restraint Value has been used | 0.0100 | Report       |
| PLAT333_ALERT_2_G | Large Aver C6-Ring C-C Dist C127 -C140 .         | 1.42   | Ang.         |
| PLAT333_ALERT_2_G | Large Aver C6-Ring C-C Dist C303 -C316 .         | 1.42   | Ang.         |
| PLAT769_ALERT_4_G | CIF Embedded explicitly supplied scattering data |        | Please Note  |
| PLAT790_ALERT_4_G | Centre of Gravity not Within Unit Cell: Resd. #  | 4      | Note         |
|                   | C48 H36 O2 Si2                                   |        |              |

|                   |                                                  |        |       |
|-------------------|--------------------------------------------------|--------|-------|
| PLAT860_ALERT_3_G | Number of Least-Squares Restraints .....         | 47     | Note  |
| PLAT912_ALERT_4_G | Missing # of FCF Reflections Above STh/L= 0.600  | 8      | Note  |
| PLAT933_ALERT_2_G | Number of HKL-OMIT Records in Embedded .res File | 4      | Note  |
| PLAT960_ALERT_3_G | Number of Intensities with I < - 2*sig(I) ...    | 43     | Check |
| PLAT978_ALERT_2_G | Number C-C Bonds with Positive Residual Density. | 1      | Info  |
| PLAT982_ALERT_1_G | The C-f' = 0.0192 Deviates from IT-value =       | 0.0181 | Check |
| PLAT982_ALERT_1_G | The O-f' = 0.0524 Deviates from IT-value =       | 0.0492 | Check |
| PLAT982_ALERT_1_G | The Si-f' = 0.2554 Deviates from IT-value =      | 0.2541 | Check |
| PLAT983_ALERT_1_G | The O-f" = 0.0338 Deviates from IT-Value =       | 0.0322 | Check |
| PLAT983_ALERT_1_G | The Si-f" = 0.3254 Deviates from IT-Value =      | 0.3302 | Check |

- 
- 0 **ALERT level A** = Most likely a serious problem - resolve or explain
  - 0 **ALERT level B** = A potentially serious problem, consider carefully
  - 30 **ALERT level C** = Check. Ensure it is not caused by an omission or oversight
  - 24 **ALERT level G** = General information/check it is not something unexpected
- 
- 8 ALERT type 1 CIF construction/syntax error, inconsistent or missing data
  - 27 ALERT type 2 Indicator that the structure model may be wrong or deficient
  - 9 ALERT type 3 Indicator that the structure quality may be low
  - 10 ALERT type 4 Improvement, methodology, query or suggestion
  - 0 ALERT type 5 Informative message, check
- 

It is advisable to attempt to resolve as many as possible of the alerts in all categories. Often the minor alerts point to easily fixed oversights, errors and omissions in your CIF or refinement strategy, so attention to these fine details can be worthwhile. In order to resolve some of the more serious problems it may be necessary to carry out additional measurements or structure refinements. However, the purpose of your study may justify the reported deviations and the more serious of these should normally be commented upon in the discussion or experimental section of a paper or in the "special\_details" fields of the CIF. checkCIF was carefully designed to identify outliers and unusual parameters, but every test has its limitations and alerts that are not important in a particular case may appear. Conversely, the absence of alerts does not guarantee there are no aspects of the results needing attention. It is up to the individual to critically assess their own results and, if necessary, seek expert advice.

### Publication of your CIF in IUCr journals

A basic structural check has been run on your CIF. These basic checks will be run on all CIFs submitted for publication in IUCr journals (*Acta Crystallographica*, *Journal of Applied Crystallography*, *Journal of Synchrotron Radiation*); however, if you intend to submit to *Acta Crystallographica Section C* or *E* or *IUCrData*, you should make sure that full publication checks are run on the final version of your CIF prior to submission.

### Publication of your CIF in other journals

Please refer to the *Notes for Authors* of the relevant journal for any special instructions relating to CIF submission.

PLATON version of 10/05/2023; check.def file version of 10/05/2023

Datablock cu\_yt4\_142\_EtOH\_2\_0m\_a - ellipsoid plot

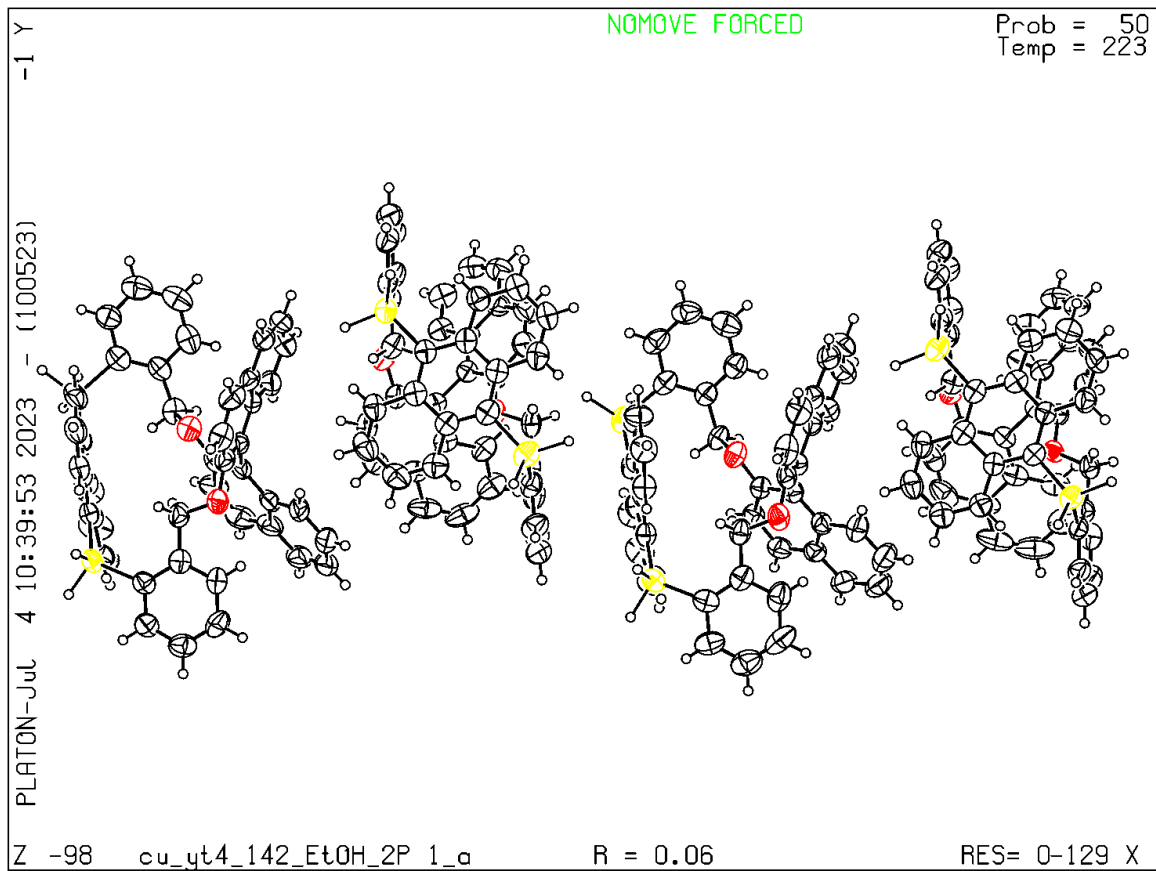



The following ALERTS were generated. Each ALERT has the format

**test-name\_ALERT\_alert-type\_alert-level.**

Click on the hyperlinks for more details of the test.

---

### ● Alert level C

CRYSC01\_ALERT\_1\_C The word below has not been recognised as a standard identifier.  
transparent

|                   |                                                  |                |              |
|-------------------|--------------------------------------------------|----------------|--------------|
| PLAT041_ALERT_1_C | Calc. and Reported SumFormula                    | Strings Differ | Please Check |
| PLAT089_ALERT_3_C | Poor Data / Parameter Ratio (Zmax < 18) .....    |                | 7.09 Note    |
| PLAT234_ALERT_4_C | Large Hirshfeld Difference O10                   | --C1DA .       | 0.16 Ang.    |
| PLAT410_ALERT_2_C | Short Intra H...H Contact H0CA                   | ..H5EA .       | 1.90 Ang.    |
|                   |                                                  | x,y,z =        | 1_555 Check  |
| PLAT420_ALERT_2_C | D-H Without Acceptor                             | Si1 --H1A .    | Please Check |
| PLAT420_ALERT_2_C | D-H Without Acceptor                             | Si1 --H1B .    | Please Check |
| PLAT420_ALERT_2_C | D-H Without Acceptor                             | Si4 --H4A .    | Please Check |
| PLAT420_ALERT_2_C | D-H Without Acceptor                             | Si4 --H4B .    | Please Check |
| PLAT420_ALERT_2_C | D-H Without Acceptor                             | Si3 --H7DA .   | Please Check |
| PLAT420_ALERT_2_C | D-H Without Acceptor                             | Si2 --H8DA .   | Please Check |
| PLAT420_ALERT_2_C | D-H Without Acceptor                             | Si2 --H9DA .   | Please Check |
| PLAT420_ALERT_2_C | D-H Without Acceptor                             | Si3 --H0EA .   | Please Check |
| PLAT420_ALERT_2_C | D-H Without Acceptor                             | Si5 --H3FA .   | Please Check |
| PLAT420_ALERT_2_C | D-H Without Acceptor                             | Si5 --H4FA .   | Please Check |
| PLAT420_ALERT_2_C | D-H Without Acceptor                             | Si6 --H5FA .   | Please Check |
| PLAT420_ALERT_2_C | D-H Without Acceptor                             | Si6 --H6FA .   | Please Check |
| PLAT601_ALERT_2_C | Structure Contains Solvent Accessible VOIDS of . |                | 38 Ang**3    |
| PLAT790_ALERT_4_C | Centre of Gravity not Within Unit Cell: Resd. #  |                | 1 Note       |
|                   | C48 H35.65 O2 Si2                                |                |              |
| PLAT911_ALERT_3_C | Missing FCF Refl Between Thmin & STh/L=          | 0.600          | 7 Report     |

---

### ● Alert level G

FORMU01\_ALERT\_1\_G There is a discrepancy between the atom counts in the \_chemical\_formula\_sum and \_chemical\_formula\_moiety. This is usually due to the moiety formula being in the wrong format.

Atom count from \_chemical\_formula\_sum: C48 H35.787 O2 Si2

Atom count from \_chemical\_formula\_moiety:C48 H36 O2 Si2

|                   |                                                  |           |               |
|-------------------|--------------------------------------------------|-----------|---------------|
| PLAT002_ALERT_2_G | Number of Distance or Angle Restraints on AtSite |           | 25 Note       |
| PLAT003_ALERT_2_G | Number of Uiso or Uij Restrained non-H Atoms ... |           | 16 Report     |
| PLAT042_ALERT_1_G | Calc. and Reported MoietyFormula Strings Differ  |           | Please Check  |
| PLAT045_ALERT_1_G | Calculated and Reported Z Differ by a Factor ... |           | 0.33 Check    |
| PLAT068_ALERT_1_G | Reported F000 Differs from Calcd (or Missing)... |           | Please Check  |
| PLAT112_ALERT_2_G | ADDSYM Detects New (Pseudo) Symm. Elem           | 2         | 85 %Fit       |
| PLAT112_ALERT_2_G | ADDSYM Detects New (Pseudo) Symm. Elem           | 2         | 85 %Fit       |
| PLAT113_ALERT_2_G | ADDSYM Suggests Possible Pseudo/New Space Group  |           | P2221 Check   |
| PLAT142_ALERT_4_G | s.u. on b - Axis Small or Missing .....          |           | 0.00006 Ang.  |
| PLAT143_ALERT_4_G | s.u. on c - Axis Small or Missing .....          |           | 0.00004 Ang.  |
| PLAT145_ALERT_4_G | s.u. on beta Small or Missing .....              |           | 0.0002 Degree |
| PLAT172_ALERT_4_G | The CIF-Embedded .res File Contains DFIX Records |           | 5 Report      |
| PLAT173_ALERT_4_G | The CIF-Embedded .res File Contains DANG Records |           | 2 Report      |
| PLAT178_ALERT_4_G | The CIF-Embedded .res File Contains SIMU Records |           | 2 Report      |
| PLAT186_ALERT_4_G | The CIF-Embedded .res File Contains ISOR Records |           | 1 Report      |
| PLAT230_ALERT_2_G | Hirshfeld Test Diff for Si5                      | --C33 .   | 7.6 s.u.      |
| PLAT230_ALERT_2_G | Hirshfeld Test Diff for Si1A                     | --C33 .   | 6.0 s.u.      |
| PLAT230_ALERT_2_G | Hirshfeld Test Diff for O12                      | --C138 .  | 7.2 s.u.      |
| PLAT230_ALERT_2_G | Hirshfeld Test Diff for Si6                      | --C116 .  | 5.3 s.u.      |
| PLAT301_ALERT_3_G | Main Residue Disorder .....                      | (Resd 1 ) | 15% Note      |
| PLAT301_ALERT_3_G | Main Residue Disorder .....                      | (Resd 2 ) | 15% Note      |
| PLAT304_ALERT_4_G | Non-Integer Number of Atoms in .....             | Resd 1    | 87.65 Check   |
| PLAT304_ALERT_4_G | Non-Integer Number of Atoms in .....             | Resd 2    | 87.72 Check   |

|                   |                                                  |        |                          |        |       |
|-------------------|--------------------------------------------------|--------|--------------------------|--------|-------|
| PLAT333_ALERT_2_G | Large Aver C6-Ring C-C Dist C19                  | -C74   | .                        | 1.42   | Ang.  |
| PLAT720_ALERT_4_G | Number of Unusual/Non-Standard Labels            | .....  |                          | 123    | Note  |
| PLAT790_ALERT_4_G | Centre of Gravity not Within Unit Cell: Resd.    | #      |                          | 2      | Note  |
|                   | C48 H35.72 O2 Si2                                |        |                          |        |       |
| PLAT790_ALERT_4_G | Centre of Gravity not Within Unit Cell: Resd.    | #      |                          | 3      | Note  |
|                   | C48 H36 O2 Si2                                   |        |                          |        |       |
| PLAT860_ALERT_3_G | Number of Least-Squares Restraints               | .....  |                          | 209    | Note  |
| PLAT910_ALERT_3_G | Missing # of FCF Reflection(s) Below Theta(Min). |        |                          | 3      | Note  |
| PLAT912_ALERT_4_G | Missing # of FCF Reflections Above STh/L=        | 0.600  |                          | 40     | Note  |
| PLAT933_ALERT_2_G | Number of OMIT Records in Embedded .res File     | ...    |                          | 2      | Note  |
| PLAT978_ALERT_2_G | Number C-C Bonds with Positive Residual Density. |        |                          | 1      | Info  |
| PLAT982_ALERT_1_G | The C-f' =                                       | 0.0192 | Deviates from IT-value = | 0.0181 | Check |
| PLAT982_ALERT_1_G | The O-f' =                                       | 0.0524 | Deviates from IT-value = | 0.0492 | Check |
| PLAT982_ALERT_1_G | The Si-f' =                                      | 0.2554 | Deviates from IT-value = | 0.2541 | Check |
| PLAT983_ALERT_1_G | The O-f" =                                       | 0.0338 | Deviates from IT-Value = | 0.0322 | Check |
| PLAT983_ALERT_1_G | The Si-f" =                                      | 0.3254 | Deviates from IT-Value = | 0.3302 | Check |

---

0 **ALERT level A** = Most likely a serious problem - resolve or explain  
0 **ALERT level B** = A potentially serious problem, consider carefully  
20 **ALERT level C** = Check. Ensure it is not caused by an omission or oversight  
38 **ALERT level G** = General information/check it is not something unexpected

11 ALERT type 1 CIF construction/syntax error, inconsistent or missing data  
26 ALERT type 2 Indicator that the structure model may be wrong or deficient  
6 ALERT type 3 Indicator that the structure quality may be low  
15 ALERT type 4 Improvement, methodology, query or suggestion  
0 ALERT type 5 Informative message, check

---

It is advisable to attempt to resolve as many as possible of the alerts in all categories. Often the minor alerts point to easily fixed oversights, errors and omissions in your CIF or refinement strategy, so attention to these fine details can be worthwhile. In order to resolve some of the more serious problems it may be necessary to carry out additional measurements or structure refinements. However, the purpose of your study may justify the reported deviations and the more serious of these should normally be commented upon in the discussion or experimental section of a paper or in the "special\_details" fields of the CIF. checkCIF was carefully designed to identify outliers and unusual parameters, but every test has its limitations and alerts that are not important in a particular case may appear. Conversely, the absence of alerts does not guarantee there are no aspects of the results needing attention. It is up to the individual to critically assess their own results and, if necessary, seek expert advice.

### Publication of your CIF in IUCr journals

A basic structural check has been run on your CIF. These basic checks will be run on all CIFs submitted for publication in IUCr journals (*Acta Crystallographica*, *Journal of Applied Crystallography*, *Journal of Synchrotron Radiation*); however, if you intend to submit to *Acta Crystallographica Section C* or *E* or *IUCrData*, you should make sure that full publication checks are run on the final version of your CIF prior to submission.

### Publication of your CIF in other journals

Please refer to the *Notes for Authors* of the relevant journal for any special instructions relating to CIF submission.

PLATON version of 03/05/2019; check.def file version of 29/04/2019

Datablock yt4\_142\_190125 - ellipsoid plot

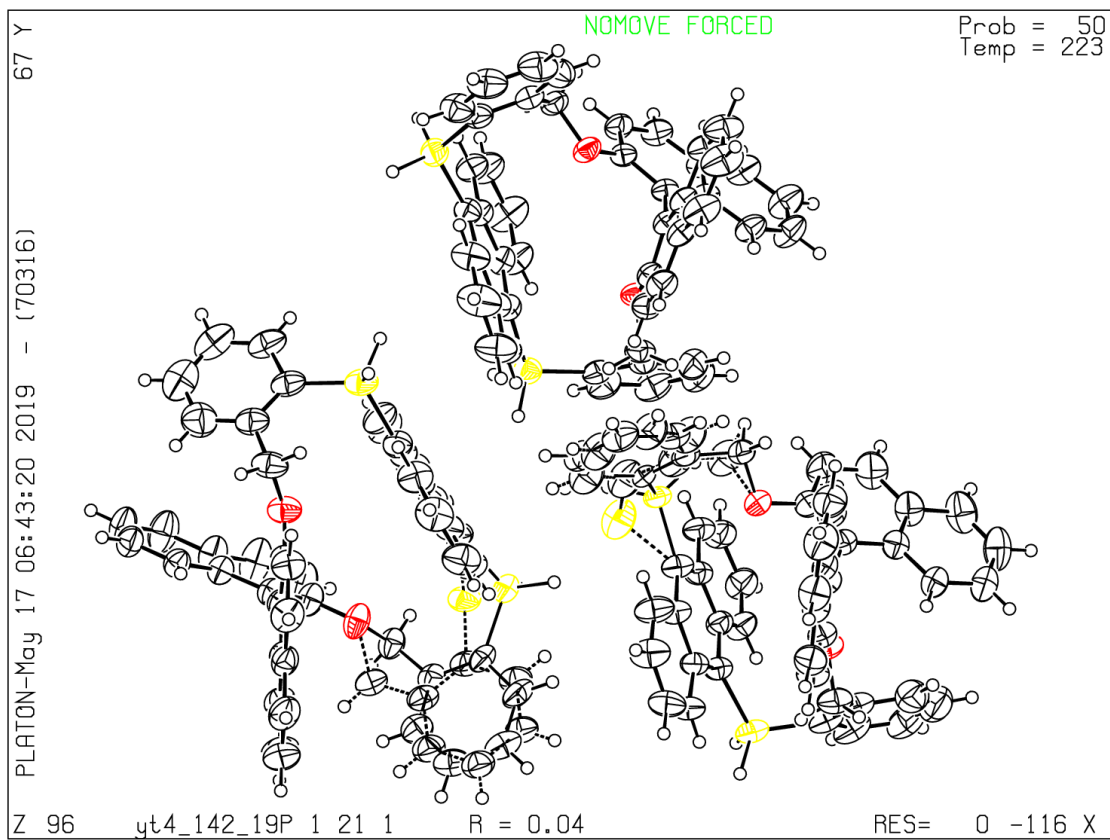





---

The following ALERTS were generated. Each ALERT has the format

**test-name\_ALERT\_alert-type\_alert-level.**

Click on the hyperlinks for more details of the test.

---

● **Alert level C**

|                   |                                                  |       |              |
|-------------------|--------------------------------------------------|-------|--------------|
| PLAT053_ALERT_1_C | Minimum Crystal Dimension Missing (or Error) ... |       | Please Check |
| PLAT054_ALERT_1_C | Medium Crystal Dimension Missing (or Error) ...  |       | Please Check |
| PLAT055_ALERT_1_C | Maximum Crystal Dimension Missing (or Error) ... |       | Please Check |
| PLAT420_ALERT_2_C | D-H Bond Without Acceptor Si01 --H01A .          |       | Please Check |
| PLAT420_ALERT_2_C | D-H Bond Without Acceptor Si01 --H01B .          |       | Please Check |
| PLAT420_ALERT_2_C | D-H Bond Without Acceptor Si02 --H02A .          |       | Please Check |
| PLAT420_ALERT_2_C | D-H Bond Without Acceptor Si02 --H02B .          |       | Please Check |
| PLAT767_ALERT_4_C | INS Embedded LIST 6 Instruction Should be LIST 4 |       | Please Check |
| PLAT906_ALERT_3_C | Large K Value in the Analysis of Variance .....  | 2.448 | Check        |
| PLAT911_ALERT_3_C | Missing FCF Refl Between Thmin & STh/L= 0.600    |       | 7 Report     |

---

● **Alert level G**

|                   |                                                  |      |             |
|-------------------|--------------------------------------------------|------|-------------|
| PLAT333_ALERT_2_G | Large Aver C6-Ring C-C Dist C00G -C00Y .         | 1.43 | Ang.        |
| PLAT720_ALERT_4_G | Number of Unusual/Non-Standard Labels .....      | 88   | Note        |
| PLAT769_ALERT_4_G | CIF Embedded explicitly supplied scattering data |      | Please Note |
| PLAT910_ALERT_3_G | Missing # of FCF Reflection(s) Below Theta(Min). | 1    | Note        |
| PLAT912_ALERT_4_G | Missing # of FCF Reflections Above STh/L= 0.600  | 3    | Note        |
| PLAT978_ALERT_2_G | Number C-C Bonds with Positive Residual Density. | 15   | Info        |

---

0 **ALERT level A** = Most likely a serious problem - resolve or explain

0 **ALERT level B** = A potentially serious problem, consider carefully

10 **ALERT level C** = Check. Ensure it is not caused by an omission or oversight

6 **ALERT level G** = General information/check it is not something unexpected

3 ALERT type 1 CIF construction/syntax error, inconsistent or missing data

6 ALERT type 2 Indicator that the structure model may be wrong or deficient

3 ALERT type 3 Indicator that the structure quality may be low

4 ALERT type 4 Improvement, methodology, query or suggestion

0 ALERT type 5 Informative message, check

---

---

It is advisable to attempt to resolve as many as possible of the alerts in all categories. Often the minor alerts point to easily fixed oversights, errors and omissions in your CIF or refinement strategy, so attention to these fine details can be worthwhile. In order to resolve some of the more serious problems it may be necessary to carry out additional measurements or structure refinements. However, the purpose of your study may justify the reported deviations and the more serious of these should normally be commented upon in the discussion or experimental section of a paper or in the "special\_details" fields of the CIF. checkCIF was carefully designed to identify outliers and unusual parameters, but every test has its limitations and alerts that are not important in a particular case may appear. Conversely, the absence of alerts does not guarantee there are no aspects of the results needing attention. It is up to the individual to critically assess their own results and, if necessary, seek expert advice.

### **Publication of your CIF in IUCr journals**

A basic structural check has been run on your CIF. These basic checks will be run on all CIFs submitted for publication in IUCr journals (*Acta Crystallographica*, *Journal of Applied Crystallography*, *Journal of Synchrotron Radiation*); however, if you intend to submit to *Acta Crystallographica Section C* or *E* or *IUCrData*, you should make sure that full publication checks are run on the final version of your CIF prior to submission.

### **Publication of your CIF in other journals**

Please refer to the *Notes for Authors* of the relevant journal for any special instructions relating to CIF submission.

---

**PLATON version of 10/05/2023; check.def file version of 10/05/2023**

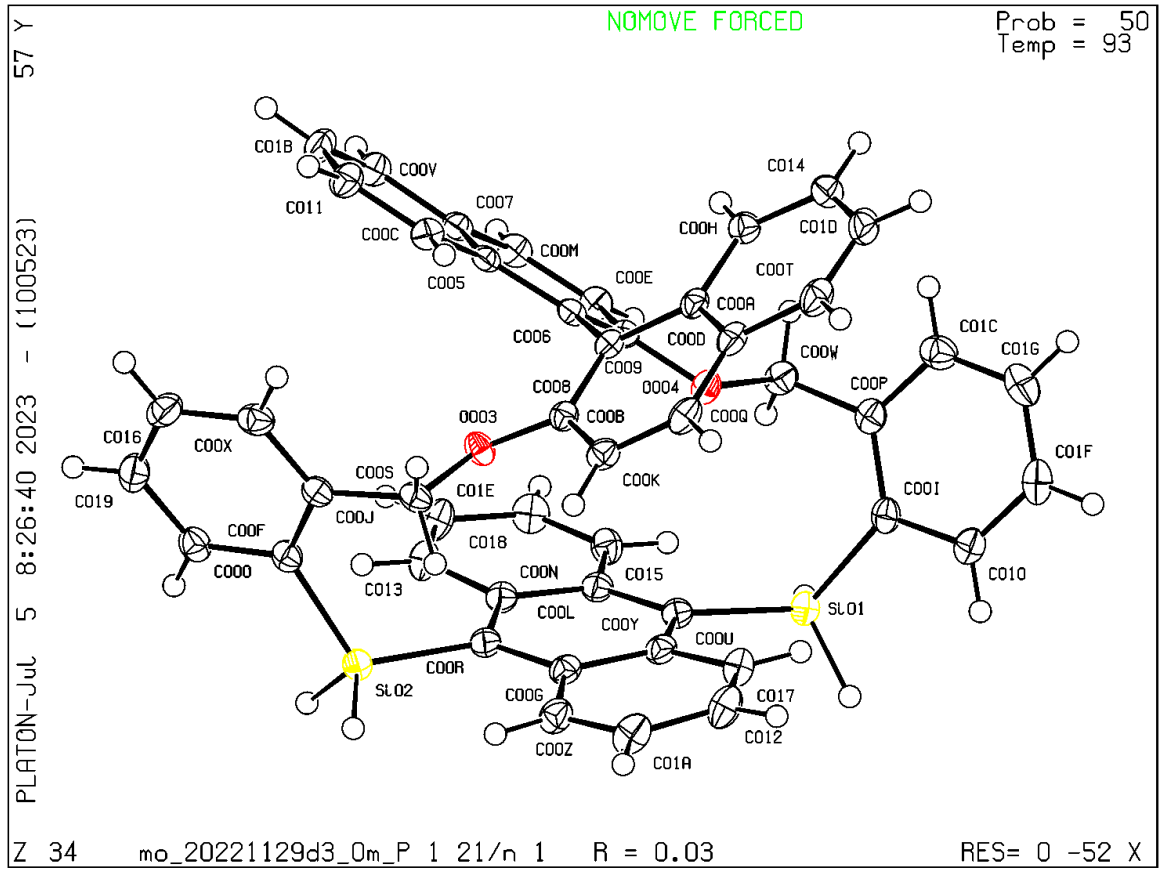

# checkCIF/PLATON report

Structure factors have been supplied for datablock(s) yt5\_010\_190218

THIS REPORT IS FOR GUIDANCE ONLY. IF USED AS PART OF A REVIEW PROCEDURE FOR PUBLICATION, IT SHOULD NOT REPLACE THE EXPERTISE OF AN EXPERIENCED CRYSTALLOGRAPHIC REFEREE.

No syntax errors found.      CIF dictionary      Interpreting this report

## Datablock: yt5\_010\_190218

---

Bond precision:    C-C = 0.0023 A

Wavelength=1.54184

Cell:            a=10.4534(1)            b=12.1010(1)            c=13.6441(1)  
                  alpha=110.811(1)        beta=104.524(1)        gamma=95.283(1)  
Temperature:    223 K

|                | Calculated     | Reported       |
|----------------|----------------|----------------|
| Volume         | 1530.15(3)     | 1530.15(3)     |
| Space group    | P -1           | P -1           |
| Hall group     | -P 1           | -P 1           |
| Moiety formula | C40 H32 O2 Si2 | C40 H32 O2 Si2 |
| Sum formula    | C40 H32 O2 Si2 | C40 H32 O2 Si2 |
| Mr             | 600.84         | 600.87         |
| Dx,g cm-3      | 1.304          | 1.304          |
| Z              | 2              | 2              |
| Mu (mm-1)      | 1.329          | 1.329          |
| F000           | 632.0          | 634.7          |
| F000'          | 634.59         |                |
| h,k,lmax       | 12,14,16       | 12,14,16       |
| Nref           | 5994           | 5873           |
| Tmin,Tmax      | 0.741,0.819    | 0.647,1.000    |
| Tmin'          | 0.688          |                |

Correction method= # Reported T Limits: Tmin=0.647 Tmax=1.000  
AbsCorr = MULTI-SCAN

Data completeness= 0.980

Theta(max)= 71.750

R(reflections)= 0.0386( 5385)

wR2(reflections)= 0.1042( 5873)

S = 1.041

Npar= 413

---

The following ALERTS were generated. Each ALERT has the format

**test-name\_ALERT\_alert-type\_alert-level.**

Click on the hyperlinks for more details of the test.

---

● **Alert level C**

CRYSC01\_ALERT\_1\_C The word below has not been recognised as a standard  
identifier.  
transparent

|                   |                                         |       |       |   |              |
|-------------------|-----------------------------------------|-------|-------|---|--------------|
| PLAT420_ALERT_2_C | D-H Without Acceptor                    | Si1   | --H1A | . | Please Check |
| PLAT420_ALERT_2_C | D-H Without Acceptor                    | Si1   | --H1B | . | Please Check |
| PLAT420_ALERT_2_C | D-H Without Acceptor                    | Si2   | --H2A | . | Please Check |
| PLAT420_ALERT_2_C | D-H Without Acceptor                    | Si2   | --H2B | . | Please Check |
| PLAT911_ALERT_3_C | Missing FCF Refl Between Thmin & STh/L= | 0.600 |       |   | 38 Report    |

---

● **Alert level G**

|                   |                                                  |        |               |              |              |
|-------------------|--------------------------------------------------|--------|---------------|--------------|--------------|
| PLAT068_ALERT_1_G | Reported F000 Differs from Calcd (or Missing)... |        |               |              | Please Check |
| PLAT154_ALERT_1_G | The s.u.'s on the Cell Angles are Equal ..(Note) |        |               | 0.001 Degree |              |
| PLAT720_ALERT_4_G | Number of Unusual/Non-Standard Labels .....      |        |               | 16           | Note         |
| PLAT910_ALERT_3_G | Missing # of FCF Reflection(s) Below Theta(Min). |        |               | 1            | Note         |
| PLAT912_ALERT_4_G | Missing # of FCF Reflections Above STh/L=        | 0.600  |               | 81           | Note         |
| PLAT978_ALERT_2_G | Number C-C Bonds with Positive Residual Density. |        |               | 13           | Info         |
| PLAT982_ALERT_1_G | The C-f' =                                       | 0.0192 | Deviates from | IT-value =   | 0.0181 Check |
| PLAT982_ALERT_1_G | The O-f' =                                       | 0.0524 | Deviates from | IT-value =   | 0.0492 Check |
| PLAT982_ALERT_1_G | The Si-f' =                                      | 0.2554 | Deviates from | IT-value =   | 0.2541 Check |
| PLAT983_ALERT_1_G | The O-f" =                                       | 0.0338 | Deviates from | IT-Value =   | 0.0322 Check |
| PLAT983_ALERT_1_G | The Si-f" =                                      | 0.3254 | Deviates from | IT-Value =   | 0.3302 Check |

---

0 **ALERT level A** = Most likely a serious problem - resolve or explain  
0 **ALERT level B** = A potentially serious problem, consider carefully  
6 **ALERT level C** = Check. Ensure it is not caused by an omission or oversight  
11 **ALERT level G** = General information/check it is not something unexpected

8 ALERT type 1 CIF construction/syntax error, inconsistent or missing data  
5 ALERT type 2 Indicator that the structure model may be wrong or deficient  
2 ALERT type 3 Indicator that the structure quality may be low  
2 ALERT type 4 Improvement, methodology, query or suggestion  
0 ALERT type 5 Informative message, check

---

---

It is advisable to attempt to resolve as many as possible of the alerts in all categories. Often the minor alerts point to easily fixed oversights, errors and omissions in your CIF or refinement strategy, so attention to these fine details can be worthwhile. In order to resolve some of the more serious problems it may be necessary to carry out additional measurements or structure refinements. However, the purpose of your study may justify the reported deviations and the more serious of these should normally be commented upon in the discussion or experimental section of a paper or in the "special\_details" fields of the CIF. checkCIF was carefully designed to identify outliers and unusual parameters, but every test has its limitations and alerts that are not important in a particular case may appear. Conversely, the absence of alerts does not guarantee there are no aspects of the results needing attention. It is up to the individual to critically assess their own results and, if necessary, seek expert advice.

### **Publication of your CIF in IUCr journals**

A basic structural check has been run on your CIF. These basic checks will be run on all CIFs submitted for publication in IUCr journals (*Acta Crystallographica*, *Journal of Applied Crystallography*, *Journal of Synchrotron Radiation*); however, if you intend to submit to *Acta Crystallographica Section C* or *E* or *IUCrData*, you should make sure that full publication checks are run on the final version of your CIF prior to submission.

### **Publication of your CIF in other journals**

Please refer to the *Notes for Authors* of the relevant journal for any special instructions relating to CIF submission.

---

**PLATON version of 03/05/2019; check.def file version of 29/04/2019**

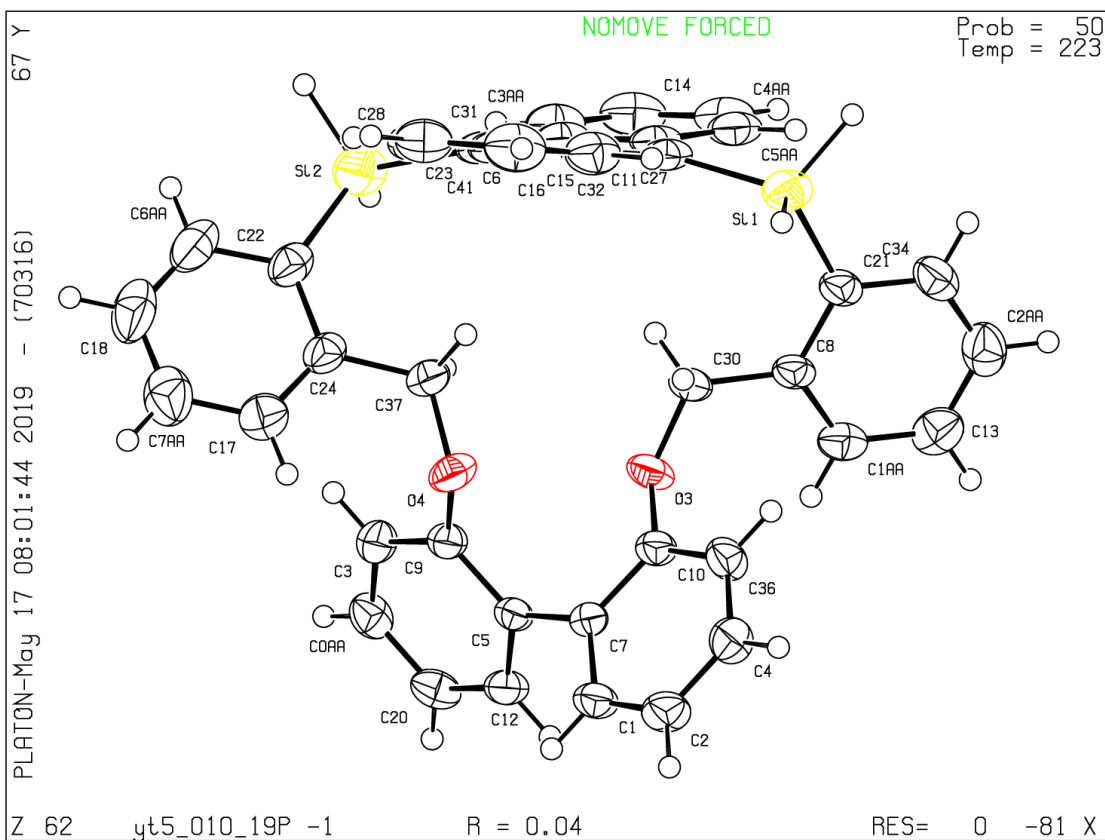

Supplement: d3cp03565d1.pdf [file d3cp03565d1.pdf]
